1 **Manipulation-specific activity in motor and somatosensory cortex as**  
2 **mice handle food**

3

4 **John M. Barrett<sup>1,a</sup>, Gordon M. G. Shepherd<sup>1</sup>**

5 <sup>1</sup>Department of Neuroscience, Feinberg School of Medicine, Northwestern University, Chicago,  
6 Illinois, USA; <sup>a</sup>Correspondence: john.barrett@cantab.net

7

8 **Food-handling offers unique yet largely unexplored opportunities to investigate how cortical**  
9 **activity relates to forelimb movements in a natural, ethologically essential, and kinematically**  
10 **rich form of manual dexterity. To determine these relationships, we recorded spiking activity**  
11 **in mouse forelimb M1 and S1 and tongue/jaw M1. Activity in all areas was strongly**  
12 **modulated in close association with discrete active manipulation events that occurred**  
13 **intermittently as mice fed. Each area’s activity was also partly distinct in its overall timing**  
14 **and phasic/tonic temporal profile, attributable to area-specific composition of activity**  
15 **classes. Forelimb position could be accurately predicted from activity in all three regions.**  
16 **These results thus establish that cortical activity during food-handling is manipulation-**  
17 **specific, distributed, and broadly similar across multiple cortical areas, while also exhibiting**  
18 **area- and submovement-specific relationships with the fast kinematic hallmarks of this form**  
19 **of complex, free-object-handling manual dexterity.**

20

## 21 INTRODUCTION

22 Manual dexterity takes many forms (Sobinov and Bensmaia, 2021). One, prominent in  
23 primates and rodents including mice, is food-handling (Whishaw and Coles, 1996; Barrett et al.,  
24 2020). Food-handling for these species is ethologically critical, constituting a basic and essential  
25 form of manual dexterity. Food-handling entails tight interaction between motor output and  
26 sensory input as the morsel is manipulated and consumed. Food-handling is kinematically rich,  
27 with rapid coordinated movements of the forelimbs and orofacial structures. These properties make  
28 food-handling an attractive behavior for studying the neurobiology of manual dexterity. For this,  
29 mice hold promise as experimentally tractable model organisms. Mice handle food similarly  
30 whether head-fixed or freely moving, and the basic kinematic features of food-handling are  
31 characterized (Barrett et al., 2020). For other forms of manual dexterity in mice, such as reach-to-  
32 grasp and learned manipulandum-based tasks, knowledge is rapidly advancing about the  
33 associated neural circuits and systems (Warriner et al., 2020). Characterizing these for mouse food-  
34 handling could provide fundamental insights into the neurobiology of not only this behavior but  
35 manual dexterity in general.

36 Forelimb motor cortex (M1) is involved in many forms of manual dexterity and thus  
37 presents a starting point for investigating cortical roles in food-handling. On the one hand, M1  
38 involvement might be minimal: motor cortex disengages over time on well-learned tasks (Hwang  
39 et al., 2019; Hwang et al., 2021), and brainstem stimulation alone can evoke food-handling-like  
40 movements (Ruder et al., 2021). On the other hand, cortical stimulation in motor areas also evokes  
41 food-handling-like behaviors in primates (Graziano et al., 2002) and mice (Hira et al., 2015;  
42 Mercer Lindsay et al., 2019); motor cortical lesions can impair food-handling in rats (Whishaw  
43 and Coles, 1996); and, M1 neurons exhibit diverse movement-related activity (Fromm and Evarts,

44 1977; Miri et al., 2017; Sjöbom et al., 2020; Guo et al., 2021). M1 activity associated with food-  
45 handling movements could take many forms. At one extreme, individual neurons could be  
46 heterogeneously active, averaging out at the population level. At another, neuronal activity could  
47 be homogeneous, fluctuating as a population. A third possibility is a hybrid pattern, combining  
48 elements of neuronal heterogeneity and population-wide fluctuations. Additionally, other cortical  
49 motor and somatosensory areas are likely involved, particularly forelimb S1 and tongue/jaw M1  
50 (Mayrhofer et al., 2019), and might be differentiated in terms of their precise timing and temporal  
51 profiles. Given the high speed of food-handling movements (Barrett et al., 2020), distinguishing  
52 among these hypothetical possibilities will require recordings of neural activity and kinematics  
53 with high temporal resolution.

54 Here, we used multielectrode array electrophysiological recordings from forelimb M1 and  
55 high-speed videography to capture neuronal spiking and kinematics at high time resolution while  
56 mice handled food. We also extended the analysis to forelimb S1 and tongue/jaw M1. To make  
57 sense of the large, complex datasets, we used analytical methods that enabled assessment of both  
58 neuron- and population-level aspects of the activity patterns. Our results establish the basic  
59 properties of food-handling related cortical activity in motor and somatosensory areas, showing  
60 robust modulation of activity in multiple areas specifically during active manipulation events, with  
61 distinct temporal profiles for each region.

62

## 63 **RESULTS**

### 64 **Forelimb M1 activity during food-handling is associated with oromanual events**

65 To investigate cortical activity during food-handling, we presented head-fixed mice with  
66 food items (sunflower seed kernels or grain pellets) and filmed their movements with close-up

67 dual-angle kilohertz-rate video while recording spiking activity from all cortical layers on multi-  
68 channel linear electrode arrays (one shank per array, 32 channels per shank, 50  $\mu\text{m}$  spacing) as  
69 they handled and consumed the morsels (**Fig. 1, Videos 1-2, Methods**). To capture kinematic and  
70 cortical activity on the extended time scale of sustained food-handling, recordings were made over  
71 tens of seconds (range: 11.7 to 97.5 sec).

72 We analyzed the videos using DeepLabCut (Mathis et al., 2018) to track movements of the  
73 hands and nose, and reconstructed their trajectories in 3D using Anipose (Karashchuk et al., 2020),  
74 from which we extracted kinematic parameters of interest. As previously (Barrett et al., 2020), we  
75 focused on the three-dimensional Euclidean hand-nose distance (L), and the 3D hand-hand  
76 distance (D) (**Fig. 1A**). Plotting these parameters over time (with L on a reverse Y axis so that  
77 upward movements of the hands correspond to upward movements of the trace) showed several  
78 characteristic features (**Fig. 1B**). These included frequent broad peaks in L indicating “oromaneal”  
79 events in which the hands brought the food item to the mouth, longer “holding” intervals in which  
80 the food item was held passively below the mouth, and intermittent fast spikes in D, observed only  
81 during oromaneal events, as the hands quickly readjusted their grip on the food (“regrips”).

82 Electrophysiological recordings from multi-channel linear arrays placed in forelimb M1  
83 were analyzed to extract single- and multi-unit spiking activity (**Fig. 1C, Methods**). From each  
84 recording we isolated  $14 \pm 12$  (mean  $\pm$  s.d.) single- and  $32 \pm 9$  multi-units per array. Single- and  
85 multi-units (“active units”) were included in all analyses of spiking activity. Plotting the firing rate  
86 over time showed frequent bursts of activity, aligned with oromaneal events. Such patterns were  
87 apparent across recordings (**Fig. S1**). Accordingly, we created oromaneal/holding ethograms from  
88 the L traces and from these calculated the average firing rates during these periods. Across animals,  
89 the firing rate was twice as high during oromaneal events compared to holding (holding  $5.5 \pm 2.0$

90 Hz, mean  $\pm$  s.d.; oromaneal  $9.9 \pm 4.5$  Hz;  $W = 0, p = 0.031$ , Wilcoxon signed-rank test,  $n = 6$  mice).  
91 However, averaging across such large temporal windows obscures the fine details of the  
92 relationship between cortical activity and food-handling kinematics. We therefore next analyzed  
93 the kinematic features of oromaneal events in finer detail.

94

### 95 **Kinematic composition of oromaneal events**

96 Closer inspection of oromaneal events shows they are composed of several distinct  
97 kinematic features (**Fig. 2A**). These include a rapid, upward, “transport-to-mouth” movement  
98 (reduction in L) as the food is brought to the mouth, and a slower, downward, “lowering-from-  
99 mouth” movement (increase in L) as the hands drop to a holding posture while the mouse chews.  
100 Regrips (spikes in D) occur during oromaneal events.

101 To quantify these features, we first aligned to threshold crossings in L. This showed a  
102 sigmoid-like trajectory for the transport-to-mouth movement and an exponential-like trajectory for  
103 the lowering-from-mouth movement. Accordingly, we fit each transition movement with the  
104 corresponding function and used these to quantify the timing (**Methods**). For the hand-nose  
105 distance, L, alignment to the onset of the transport-to-mouth movement showed an average  
106 amplitude of  $4.7 \pm 1.7$  mm (mean  $\pm$  s.d.,  $n = 9$  mice, **Table 1**) and duration of  $246 \pm 116$  ms (**Fig.**  
107 **2B, left**). At the end of oromaneal events, the lowering-from-mouth movement had a similar  
108 average amplitude of  $4.6 \pm 1.5$  mm but a longer duration of  $4.0 \pm 1.1$  s (**Fig. 2B, right**).

109 For the hand-hand distance, D, alignment to the peak of the regrip showed a roughly bell-  
110 shaped trajectory, with an amplitude of  $3.2 \pm 0.6$  mm and duration (based on width at half-  
111 maximum of the peak) of  $25.1 \pm 4.6$  ms (**Fig. 2B, middle**).

112           These basic features of oromanual events were highly stereotyped, as reflected by the low  
113 coefficients of variation for the kinematic parameters (**Table 2**). Oromanual event durations,  
114 measured from the end of the lowering-from-mouth movement to the beginning of the transport-  
115 to-mouth movement, averaged  $2.48 \pm 0.95$  s. The number of regrips per oromanual event was  $3.9$   
116  $\pm 1.5$  (regrips/oromanual), and most events ( $91 \pm 11\%$  across all mice) had at least one regrip. The  
117 number of regrips increased with oromanual duration by an average of  $1.2 \pm 0.2$  regrips per second  
118 spent in an oromanual event (linear mixed-effects regression of number of regrips on duration with  
119 mouse as grouping variable,  $n = 9$  mice,  $F_{174} = 40.4$ ,  $p = 1.8 \times 10^{-9}$ ), and the latency to the first  
120 regrip averaged  $170 \pm 49$  ms. The durations of each component were distributed in an  
121 approximately log-normal manner (**Fig. 2C**). Transitions between oromanual and holding occurred  
122 at a rate of  $0.24 \pm 0.06$  Hz with  $36 \pm 8\%$  of time spent in the oromanual mode.

123           We used optogenetic silencing to assess the effects of transient motor cortex inactivation  
124 on food-handling in a cohort of Ai32xPV-cre mice ( $n = 4$ , **Table 1, Methods**) (Morandell and  
125 Huber, 2017; Li et al., 2019). During bilateral silencing of forelimb M1, regrip frequency fell  
126 compared to periods preceding and following silencing (repeated-measures ANOVA,  $n = 4$ ,  $F_2 =$   
127  $6.7$ ,  $p = 0.03$ ) (**Fig. 2D, Video 3**). Other kinematic parameters were not significantly affected  
128 (trajectories of transport-to-mouth, lowering-from-mouth, or regrip movements; durations of  
129 oromanual or holding modes; likelihood of transitions).

130           Conversely, we used optogenetic stimulation of channelrhodopsin-2 (ChR2) expressing  
131 corticospinal neurons in forelimb M1 to assess how transient motor cortex activation might affect  
132 food-handling ( $n = 4$  mice, **Table 1, Methods**). Selective corticospinal activation, when delivered  
133 during holding intervals, rapidly evoked transport-to-mouth movements (**Fig. 2E, Video 4**), with  
134 a significantly higher probability of observing a transport-to-mouth in the 400 ms following

135 stimulus onset in holding (repeated-measures ANOVA,  $n = 4$ ,  $F_2 = 112.1$ ,  $p = 1.8 \times 10^{-5}$ ) compared  
136 to one second before (pre vs peri:  $p = 0.006$ , Bonferroni method) or after (peri vs post:  $p = 0.005$ ).  
137 Regrip rate was not affected, nor were other kinematic parameters. This effect was not seen in one  
138 mouse where corticospinal transfection failed, resulting in no Chr2 expression, nor was it seen in  
139 PVxAi32 mice, ruling out the possibility that the evoked transport-to-mouth is a visual reaction to  
140 the laser.

141 Collectively, these analyses quantify the major kinematic features of oromaneal events and  
142 establish that modulation of forelimb M1 activity influences food-handling behavior, providing a  
143 basis for detailed analysis of related cortical activity.

144

#### 145 **Phasic-tonic oromaneal-related activity in forelimb M1**

146 To assess how the firing of active units related to the different features of oromaneal events,  
147 we aligned the kinematic and neural data to the transport-to-mouth, regrip, or lowering-from-  
148 mouth movements. As shown in the example experiment (**Fig. 3A-F**), while the hand-nose  
149 distance,  $L$ , remained low throughout oromaneal events (**Fig. 3A-B**), the example active unit  
150 increased in firing around transport-to-mouth movements (**Fig. 3C,E; left**) and regrips (**Fig. 3C,E;**  
151 **middle**), then fell to lower levels, returning to baseline with the lowering-from-mouth movement  
152 (**Fig. 3C,E; right**). This pattern was observed for many active units recorded in this experiment  
153 (**Fig. 3D-F**), and across mice (**Fig. 3G-I**).

154 Across experiments and mice, many active units in forelimb M1 were significantly  
155 positively modulated (bootstrap test, Holm-Bonferroni corrected  $p$ -values  $< 0.05$ ,  $36 \pm 19\%$  of  
156 active units, mean  $\pm$  s.d.,  $n = 6$  mice, **Fig. 3J**) around the transport-to-mouth movement and none  
157 were significantly inhibited. Firing rate increases of significantly excited active units began  $41 \pm$

158 33 ms before the transport-to-mouth movement and peaked  $112 \pm 96$  ms after movement onset  
159 (**Fig. 3K**). Similarly, we analyzed how cortical activity relates to regrips (middle panels in **Fig.**  
160 **3A-I**). A small fraction of active units was significantly excited around regrips ( $10 \pm 12\%$ ), while  
161 very few ( $0.4 \pm 1.2\%$ ) were inhibited (**Fig. 3J**). Finally, very few active units were significantly  
162 modulated around the lowering-from-mouth movement ( $0.3 \pm 1\%$  excited,  $1.9 \pm 5.9\%$  inhibited;  
163 **Fig. 3J**). Because activity tended to fall to lower levels after an early peak, we calculated a phasic-  
164 tonic index (PTI) (Shalit et al., 2012) for all active units (not just those significantly modulated)  
165 as the ratio of  $(FR_{\text{peak}} - FR_{\text{end}})/(FR_{\text{peak}} + FR_{\text{end}})$ , i.e. the difference between firing in a 200 ms  
166 window surrounding its peak to firing in a 200 ms window at the end of each oromanual event,  
167 divided by their sum. (Perfectly tonic activity thus yields a PTI of 0, whereas perfectly phasic  
168 activity yields a PTI of 1.) Across mice, the average PTI was  $0.46 \pm 0.08$  (**Fig. 3L**), indicating a  
169 phasic-tonic pattern in which the average active unit's firing peaks early and then decays to roughly  
170 one quarter of its peak by the end of the oromanual event.

171         Given the generally unidirectional modulation of active unit firing around oromanual  
172 events in forelimb M1, we next considered the probe-average firing rate, which showed a similar  
173 pattern for all units or only those significantly modulated (**Fig. 3G-H**). Across mice, activity  
174 started to rise slightly before the hands began to move towards the mouth, peaked around when  
175 the hands reached the mouth, and fell shortly thereafter, remaining elevated above baseline until  
176 the lowering-from-mouth movement. The average PTI for probe-average activity was  $0.28 \pm 0.05$   
177 (**Fig. 3L**), indicating a phasic-tonic pattern in which activity decays to about one half of its peak  
178 by the end of an oromanual event. This pattern was also apparent when oromanual events and the  
179 associated probe-average activity traces were time-warped to equal durations (**Fig. 3M**).

180



## 181 **Tonic activity in tongue/jaw M1 and an intermediate pattern in forelimb S1**

182 Because oromanual movements also involve the mouth and jaw, we made additional  
183 recordings in an area designated “tongue/jaw M1”, implicated in oral movements and located  
184 anterior and lateral to forelimb M1 (Mayrhofer et al., 2019). Tongue/jaw M1 activity was overall  
185 higher during oromanual events compared to holding intervals (mean  $\pm$  s.d.: holding  $7.1 \pm 4.9$  Hz;  
186 oromanual  $18.1 \pm 10.0$  Hz; paired *t*-test:  $t_3 = 3.70$ ,  $p = 0.03$ ,  $n = 4$  mice). As shown in the examples  
187 and borne out in averages (**Fig. 4A-I**), alignment to the onset of the transport-to-mouth showed a  
188 rise in activity as the hands raised towards the mouth, with  $52 \pm 25\%$  of active units significantly  
189 excited and none significantly inhibited (**Fig. 4J**). Of the significantly excited units, their onset  
190 latency was  $212 \pm 223$  ms after the transport-to-mouth movement onset and their peak latency was  
191  $484 \pm 107$  ms (**Fig. 4K**). A small fraction ( $16 \pm 11\%$ ) of active units were significantly excited  
192 around regrips and  $2.6 \pm 2.9\%$  significantly inhibited (**Fig. 4J**). Very few active units were  
193 significantly modulated around lowering-from-mouth movements (excited:  $1.4 \pm 3.2\%$ , inhibited:  
194  $7.1 \pm 8.4\%$ ; **Fig. 4J**). Tongue/jaw M1 units had a PTI of  $0.23 \pm 0.04$  (**Fig. 4L**). Contrasting with  
195 forelimb M1, probe-average firing activity in tongue/jaw M1 activity remained elevated over the  
196 course of oromanual events, only decaying to baseline levels with the return to holding posture  
197 (**Fig. 4G-H**). This was reflected by a much lower phasic-tonic index of  $0.002 \pm 0.09$  (**Fig. 4L**),  
198 which was not significantly different from zero (paired *t*-test:  $t_3 = 0.32$ ,  $p = 0.77$ ), indicating tonic  
199 activity. A tonic pattern was also evident in the time-warped traces (**Fig. 4M**).

200 Because oromanual movements also involve forelimb somatosensation, we also recorded  
201 from the forelimb region of the primary somatosensory (S1) area, located laterally adjacent to  
202 forelimb M1 (Yamawaki et al., 2021). Forelimb S1 activity was overall higher during oromanual  
203 events compared to holding intervals (mean  $\pm$  s.d.: holding  $7.9 \pm 3.2$  Hz; oromanual  $18.5 \pm 8.4$  Hz;

204 paired  $t$ -test:  $t_4 = 2.9$ ,  $p = 0.04$ ,  $n = 5$  mice). As shown in the examples and borne out in averages  
205 (**Fig. 5A-I**), alignment to the onset of the transport-to-mouth showed a rise in activity as the hands  
206 raised towards mouth, with  $26 \pm 19\%$  of active units significantly excited but none significantly  
207 inhibited (**Fig. 5J**). Of the significantly excited units, their onset latency was  $50 \pm 106$  ms after the  
208 transport-to-mouth movement onset and their peak latency was  $286 \pm 83$  ms (**Fig. 5K**). There was  
209 a significant effect of cortical area on onset (Kruskal-Wallis ANOVA:  $\chi^2 = 6.7$ ,  $p = 0.04$ ) and peak  
210 latency ( $\chi^2 = 10.6$ ,  $p = 0.005$ ), with follow-up tests showing significantly longer onset ( $p = 0.03$ ,  
211 Bonferroni method) and peak ( $p = 0.005$ ) latencies in tongue/jaw M1 compared to forelimb M1.

212         Aligning to regrips,  $17 \pm 12\%$  of forelimb S1 active units were significantly excited but  
213 only  $1.8 \pm 4.9\%$  significantly inhibited (**Fig. 5J**). Few active units were significantly modulated  
214 around lowering-from-mouth movements ( $11 \pm 9\%$ ), and none were significantly inhibited (**Fig.**  
215 **5J**). Forelimb S1 units had a lower PTI compared to those in forelimb M1 of  $0.33 \pm 0.17$  (**Fig.**  
216 **5L**). Probe-average forelimb S1 activity showed a similar phasic-tonic pattern to that seen in  
217 forelimb M1 (**Fig. 5G-H**), with a comparable phasic-tonic index of  $0.22 \pm 0.11$  (**Fig. 5L**). There  
218 were significant effects of cortical area on phasic-tonic index regardless of whether they were  
219 calculated on active units or probe-average responses (permutation test,  $p < 2 \times 10^{-16}$ ), with follow-  
220 up tests showing tongue/jaw M1 was significantly more tonic than forelimb M1 ( $p = 0.00002$ ), but  
221 no difference between forelimb M1 and forelimb S1 ( $p = 0.08$ ). Controlling for region, active units  
222 were significantly more phasic than probe-average activity ( $p = 0.0004$ ). The interaction between  
223 region and PTI calculation method was not significant ( $p = 0.49$ ). The temporal profile of both the  
224 time-warped activity for forelimb S1 (**Fig. 5M**) was intermediate between those of the other two  
225 regions.

226           These results indicate that cortical activity during food-handling exhibits both area-  
227 common and area-specific patterns. Activity was strongly associated with oromanual events in all  
228 three areas, reaching higher peak levels in tongue/jaw M1 and forelimb S1 than in forelimb M1.  
229 Oromanual-related activity followed a phasic-tonic pattern in forelimb M1, tonic pattern in  
230 tongue/jaw M1, and an intermediate pattern in forelimb S1. Timing of the initial rise was similar  
231 in all three areas, peaking earliest in forelimb M1 and slightly later in tongue/jaw M1 and forelimb  
232 S1.

233

#### 234 **Phasic and tonic activity classes within and across areas**

235           Averaging activity across probe channels may obscure heterogeneity in the patterns of  
236 event-aligned activity exhibited by active units within a given area. To address this, we used non-  
237 negative matrix factorization (NNMF) (Lee and Seung, 1999) to simultaneously perform  
238 dimensionality reduction and unsupervised clustering (**Methods**). Unlike related dimensionality  
239 reduction techniques such as principal components analysis, NNMF constrains the extracted  
240 features to be non-negative, making it particularly suited to spike train data, and also clusters the  
241 data by assigning each neuron to a cluster based on the factor for which that neuron has the greatest  
242 weight (Xu et al., 2020).

243           Applying NNMF to pooled data from all three areas, where the number of clusters was  
244 chosen automatically by bi-cross-validation, revealed two clusters of activity (**Fig. 6**). One cluster  
245 followed a phasic-like pattern, rising before the transport-to-mouth movement, briefly peaking,  
246 and falling thereafter. A second cluster, by contrast, showed a tonic-like pattern delayed relative  
247 to the transport-to-mouth movement, peaking around regrips, and remaining elevated until the  
248 lowering-from-mouth movement. These phasic-like and tonic-like patterns pertain to the clusters

249 as a whole and not to the active units themselves, whose activity exhibited various patterns and  
250 peaked at various times in relation to the kinematics (**Fig. 6A-D**), and were more phasic than probe-  
251 average activity (**Fig. 3M, Fig. 4M, Fig. 5M**). Further, these clusters were differentially  
252 apportioned across cortical areas (**Fig. 6E**), creating the distinct area-specific average activity  
253 patterns. Applying NNMF to data from each area individually also found two clusters in each area  
254 (**Fig. S2**), which were qualitatively similar to the clusters found in the pooled data, although with  
255 a stronger transport-to-mouth peak in the forelimb M1 phasic-like cluster and a strong regrip-  
256 aligned peak in the forelimb S1 tonic-like cluster.

257

## 258 **Forelimb areas predict future hand position while tongue/jaw M1 encodes current hand** 259 **position**

260 The preceding analyses maybe biased by the choice of kinematic features considered and  
261 events aligned to. As a complementary approach, we correlated cortical activity with the 3D  
262 positions of the hands using whole (un-event-aligned) recordings. To do so we fit general linear  
263 models (GLMs) from sliding windows of binned neural activity to the kinematics (**Fig. 7**), using  
264 ridge regularization and cross-validation to deal with overfitting and multicollinearity (see  
265 **Methods**). Initially, the decoding window was large, using both past and future spiking activity to  
266 predict kinematics.

267 As shown in an example (**Fig. 7A-B**) of a neural recording and the corresponding GLM  
268 coefficients for each hand coordinate, most active units showed a strong anticorrelation with  
269 kinematics at negative lags. The GLMs accurately reconstructed the 3D position of both hands in  
270 this recording (**Fig. 7C**), and hence also accurately reconstructed L ( $R^2 = 88\%$ ) and D ( $R^2 = 45\%$ ),  
271 **Fig. 7D**), even though the GLMs were not explicitly trained to do so. Across experiments, mice,

272 and regions, reconstruction accuracy was high (**Fig. 7E**), with a significant effect of dimension (X,  
273 Y, or Z, perpendicular to the sagittal, coronal, and horizontal planes, respectively) on  
274 reconstruction accuracy (mixed ANOVA, side and dimension as within-subjects factors, region as  
275 between-subjects factor,  $F_{2/24} = 46.9$ ,  $p = 1.0 \times 10^{-8}$ , Greenhouse-Geisser corrected), but not side  
276 (contra vs ipsi), region, or any of their interactions. Reconstruction accuracy was highest for Z and  
277 lowest for X ( $p < 0.05$ , Bonferroni corrected, for all pairwise follow-up comparisons).

278 Plotting the neuron-average GLM coefficients (**Fig. 7F**) shows the temporal relationship  
279 between activity and reconstructed kinematics. For forelimb M1, neurons are on average  
280 anticorrelated with forearm Z position at negative lags, peaking at around 200 ms, then very  
281 slightly positively correlated at short positive lags. Forelimb S1 is increasingly anticorrelated at  
282 negative lags approaching zero, whereas the strongest anticorrelation for tongue/jaw M1 is around  
283 zero lag. Similar results were seen for X and Y. To further explore the temporal relationship  
284 between activity and kinematics, we varied the size and central lag of the window used for fitting  
285 the GLMs (**Fig. 7G, Fig. S3**). Reconstruction accuracy increased monotonically with window size  
286 but even using a single bin was above chance at many lags. Reconstruction accuracy varied  
287 depending on the central lag of the reconstruction. To summarize this relationship, we considered  
288 the highest reconstruction accuracy lag for the 420 ms window (as for longer windows the temporal  
289 relationship was less clear). For both forelimb M1 and S1, accuracy peaked around 200 ms  
290 preceding kinematics, although forelimb S1 was more variable, whereas tongue/jaw M1 peaked  
291 around zero lag (**Fig. 7H**). There was a significant effect of region on best reconstruction lag  
292 (Kruskal-Wallis ANOVA,  $\chi^2 = 6.8$ ,  $p = 0.03$ ), with the only significant difference in follow-up  
293 tests being between forelimb M1 and tongue/jaw M1 ( $p = 0.03$ , Bonferroni method).

294 Together, these results confirm that significant information about forelimb position is  
295 carried in cortical firing activity during food handling. In forelimb M1 and S1, this information is  
296 predictive, leading kinematics, whereas in tongue/jaw M1 there is a tight temporal correlation  
297 between firing activity and hand position. This corroborates the earlier findings, in particular the  
298 better reconstruction accuracy for Z accords with the significant modulation of all areas by  
299 transport-to-mouth movements, and the zero-lag peak for tongue/jaw M1 fits with its tonic activity  
300 profile.

301

## 302 **DISCUSSION**

303 We studied cortical activity associated with food-handling, as a step towards understanding  
304 the neurobiology of this ethologically critical behavior. The main findings show that cortical  
305 activity is (i) associated with specific kinematic features of food-handling movements relating to  
306 oromanual manipulation events, (ii) is distributed across multiple motor and somatosensory areas,  
307 with both area-common and area-specific features, (iii) exhibits prominent overall population-wide  
308 manipulation-related fluctuations but with some degree of heterogeneity at the level of individual  
309 neurons, and (iv) is temporally differentiated and predictive of current or future hand kinematics,  
310 in an area-dependent manner. Collectively our results provide a detailed characterization of multi-  
311 areal cortical activity associated with this form of manual dexterity in a food-handling mammal.

312 Our technical approach entailed addressing several methodological considerations relevant  
313 to food-handling behavior. Food-handling involves high-speed movements with millisecond-scale  
314 features, necessitating a video camera with high frame rate, sensitivity, and storage capacity. Dual  
315 camera views helped to mitigate problems of intermittent occlusion of visibility and provided  
316 datasets for 3D reconstruction of movement trajectories. Multichannel electrophysiology enabled

317 spiking activity of cortical neurons to be sampled on a fast time scale comparable to the kinematic  
318 data. Regarding the behavioral analyses, most of these focused on experimenter-chosen features  
319 (holding vs oromaneal modes, transport-to-mouth, lowering-from mouth, regrips), which  
320 potentially introduces bias. The GLM analysis avoided this by focusing on whole kinematic and  
321 neural traces, but newer unsupervised methods (Wiltchko et al., 2015; Batty et al., 2019; Pereira  
322 et al., 2020; Hsu and Yttri, 2021; Whiteway et al., 2021) might reveal further features or structure  
323 of food-handling behavior overlooked here.

324         The widespread cortical activity during the active, oromaneal periods of food-handling is  
325 striking both for its spatial distribution and the depth of modulation, with large fractions of neurons  
326 in each area displaying significant manipulation-specific activity. Manipulation-related neural  
327 activity could (in principle, and in the extreme) be either heterogenous, with no overall pattern, or  
328 homogenous, with neurons covarying together as an ensemble. The active unit, probe-average, and  
329 reconstruction analyses suggest the second possibility. In aggregate, cortical activity varied  
330 unidirectionally with food-handling, increasing during active manipulation events and decreasing  
331 during passive holding intervals. However, two results show that this is an oversimplification.  
332 Active units in all regions are on average more phasic than the corresponding average traces, which  
333 would be impossible if they fired together as one homogenous population. Second, NNMF  
334 clustering revealed two activity patterns shared between areas, rather than one global pattern or a  
335 single cluster per area, implying deeper structure to the population response that is obscured by  
336 simple averaging.

337         Our results reveal both area-common and area-specific features of oromaneal-associated  
338 cortical activity. Forelimb M1 showed a phasic-tonic activity pattern, peaking around the  
339 transport-to-mouth movement then decaying to above baseline firing rates. Forelimb M1 units

340 were predictive of future movements and increased their firing tens of milliseconds before  
341 movement initiation, longer than reported latencies to electromyographic responses from mouse  
342 motor cortical stimulation (Ayling et al., 2009). Our and others' silencing results (Guo et al., 2015;  
343 Mohan et al., 2021) argue against forelimb M1 directly driving food-handling movements, but  
344 suggest forelimb M1 does influence food-handling behavior. We interpret the lack of complete  
345 abolishment of food-handling movements by M1 silencing to reflect that other circuits in a  
346 distributed network are involved in supporting this behavior. Indeed, redundancy in the network  
347 controlling such a fundamental behavior would be highly adaptive, and has been seen in other  
348 motor behaviors (Li et al., 2016; Morandell and Huber, 2017). Stimulation of forelimb M1  
349 corticospinal neurons evoked transport-to-mouth movements, but at sufficiently long latencies to  
350 suggest that the effect occurs via these downstream circuits rather than direct drive of spinal  
351 circuits alone. The precise circuits responsible remain an open question, but could involve  
352 corticospinal branches to the striatum, midbrain, or brainstem (BICCN, 2021; Nelson et al., 2021).

353 In addition to forelimb M1, we also found manipulation-related activity in two other  
354 cortical regions, tongue/jaw M1 and forelimb S1. Activity in tongue/jaw M1 was delayed and tonic  
355 compared to forelimb M1. Rather than predicting future kinematics, it closely tracked the current  
356 hand position. This may be an epiphenomenon, with tongue/jaw M1 activity relating to orofacial  
357 movements during oromanual events that we were unable track due to occlusion by the hands (but  
358 may be revealed by electromyography of orofacial muscles such as the masseter). Alternatively,  
359 tracking the current forelimb position may facilitate the intricate coordination of the hands and  
360 mouth involved in food-handling. Similarly, some component of activity in forelimb M1 may  
361 represent information about current orofacial movements. Together with the lack of tongue/jaw  
362 M1 activity during the holding interval despite robust jaw activity as the mouse chews, this accords



363 with the concept of an ethological action map in motor areas (Graziano, 2016), rather than simple  
364 somatotopy, as suggested by some recent motor mapping studies (Hira et al., 2015; Mercer Lindsay  
365 et al., 2019). Activity in forelimb S1 was quantitatively intermediate between forelimb M1 and  
366 tongue/jaw M1. This may be due to feed-forward input from forelimb M1 followed by incoming  
367 tactile information (Umeda et al., 2019) resulting in a temporally smeared version of the forelimb  
368 M1 activity trace. Alternatively, it may imply that forelimb S1 relays information from forelimb  
369 M1 to tongue/jaw M1. Characterization of connectivity between these regions and area-specific  
370 optogenetic stimulation will help distinguish these possibilities.

371 Our findings substantially advance knowledge about cortical involvement in manual  
372 dexterity. More detailed activity-perturbation studies and cell-type resolved methods have  
373 potential to elucidate the precise roles of cortical and subcortical circuits in this behavior. The  
374 population-wide fluctuations observed suggest neuromodulatory systems, particularly  
375 noradrenergic input from the locus coeruleus, as an avenue for future study. Finally, independent  
376 feeding is an important activity of daily living that may be lost as a result of conditions such as  
377 stroke and spinal cord injury. Deeper understanding of the neurobiology of food-handling,  
378 including similarities and differences across species, will inform efforts to restore function to such  
379 patients, and the results and methodological advances presented here contribute towards this goal.

380

381

382 **TABLES**

383 **Table 1: Mice appearing in this paper**

| #       | Age (days) | Sex | Pre-restriction Body Weight (g) | Post-restriction Body Weight (g) | % of Initial Weight | # Habituation Days | Recorded Regions    |
|---------|------------|-----|---------------------------------|----------------------------------|---------------------|--------------------|---------------------|
| 1       | 284        | M   | 27.6                            | 23.5                             | 85.1                | 39                 | fl-M1, fl-S1        |
| 2       | 238        | M   | 28.1                            | 24.6                             | 87.5                | 37                 | tj-M1               |
| 3       | 239        | F   | 21.1                            | 19.3                             | 91.5                | 42                 | fl-S1               |
| 4       | 111        | F   | 19.9                            | 17.4                             | 87.4                | 35                 | fl-M1, tj-M1        |
| 5       | 173        | F   | 22.5                            | 19.4                             | 86.2                | 29                 | fl-M1               |
| 6       | 120        | F   | 19.6                            | 17.8                             | 90.8                | 36                 | fl-M1, fl-S1, tj-M1 |
| 7       | 178        | M   | 26.6                            | 24.3                             | 91.4                | 30                 | fl-M1, fl-S1        |
| 8*      | 131        | F   | 21.0                            | 18.4                             | 87.6                | 38                 | fl-M1               |
| 9       | 116        | M   | 19.5                            | 17.8                             | 91.1                | 28                 | fl-S1, tj-M1        |
| 10†     | 227        | M   | 24.0                            | 23.1                             | 96.3                | 37                 | N/A                 |
| 11†     | 246        | F   | 22.1                            | 19.2                             | 86.9                | 37                 | N/A                 |
| 12†     | 281        | F   | 21.3                            | 18.7                             | 87.8                | 30                 | N/A                 |
| 13‡     | 119        | M   | 23.1                            | 20.5                             | 88.7                | 37                 | N/A                 |
| 14‡     | 128        | M   | 25.5                            | 22.4                             | 87.8                | 39                 | N/A                 |
| 15‡     | 110        | M   | 26.8                            | 24.2                             | 90.3                | 38                 | N/A                 |
| 16‡     | 130        | M   | 24.9                            | 21.8                             | 87.6                | 39                 | N/A                 |
| Mean:   | 176.9      |     | 23.4                            | 20.7                             | 89.0                | 35.7               |                     |
| S.D.:   | 64.8       |     | 2.9                             | 2.6                              | 2.8                 | 4.2                |                     |
| Median: | 152        |     | 22.8                            | 20.0                             | 87.8                | 37                 |                     |
| M.A.D.: | 38.5       |     | 2.4                             | 2.2                              | 1.3                 | 2                  |                     |

384

385 \*Used for optogenetic silencing and electrophysiological recording

386 †Used for optogenetic silencing only

387 ‡Used for corticospinal stimulation

388

389

390

391 **Table 2: Kinematic properties of oromanual events**

| Kinematic feature            | Parameter      | Mean $\pm$ s.d. | Median $\pm$ m.a.d. | CV (mean $\pm$ s.d.) |
|------------------------------|----------------|-----------------|---------------------|----------------------|
| Transport-to-mouth movement  | Duration (ms)  | 246 $\pm$ 116   | 176 $\pm$ 40        | 0.55 $\pm$ 0.36      |
|                              | Amplitude (mm) | 4.7 $\pm$ 1.6   | 5.1 $\pm$ 1.5       | 0.23 $\pm$ 0.09      |
| Lowering-from-mouth movement | Duration (ms)  | 4006 $\pm$ 1172 | 2707 $\pm$ 519      | 0.90 $\pm$ 0.69      |
|                              | Amplitude (mm) | 4.6 $\pm$ 1.5   | 5.3 $\pm$ 1.3       | 0.28 $\pm$ 0.12      |
| Regrips                      | Duration (ms)  | 25 $\pm$ 5      | 20 $\pm$ 3          | 1.24 $\pm$ 0.89      |
|                              | Amplitude (mm) | 3.2 $\pm$ 0.6   | 2.7 $\pm$ 0.4       | 0.55 $\pm$ 0.24      |
| Latency to first regrip      | Latency (ms)   | 916 $\pm$ 745   | 170 $\pm$ 49        | 2.15 $\pm$ 1.43      |
| Oromanual event duration     | Duration (ms)  | 2784 $\pm$ 1150 | 2380 $\pm$ 1037     | 0.56 $\pm$ 0.19      |
| Holding interval duration    | Duration (ms)  | 4902 $\pm$ 919  | 4372 $\pm$ 738      | 0.54 $\pm$ 0.21      |

392

393

394

395

396

397 **FIGURES**

398

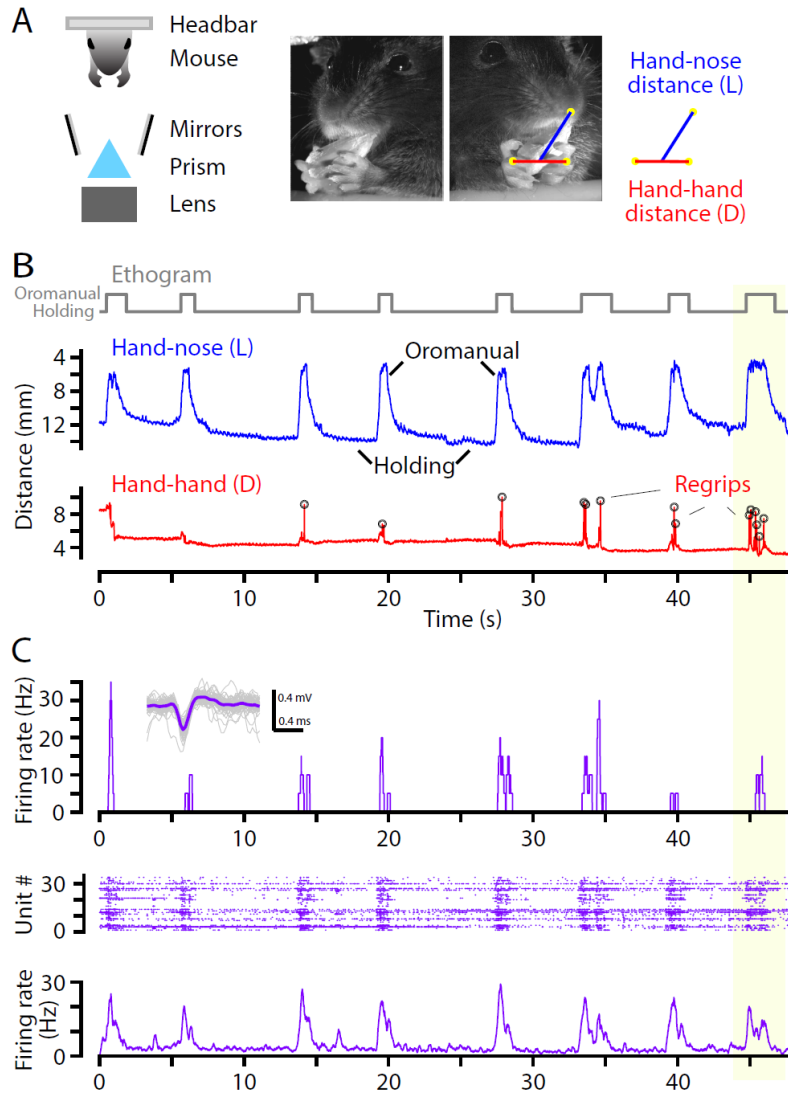

399

400 **Fig. 1: Forelimb M1 activity during food-handling is associated with oromaneal events**

401 (A) Kinematics were recorded by a close-up kilohertz-rate video system, and cortical activity was  
402 recorded on multi-channel linear arrays, while head-fixed mice handled food items (left). Video  
403 frames (middle) were analyzed to track hand movements, and kinematic data were analyzed to  
404 calculate the hand-nose (L) and hand-hand (D) distances (right).

405 (B) Example trace of the hand-nose distance (L, blue, reverse y-axis) over time, showing  
406 characteristic “oromaneal” events (intermittent peaks in L), separated by a “holding” postural  
407 mode (large L). The trace of the hand-hand distance (D, red) shows fast spikes corresponding to  
408 “regrip” events. Ethogram (top) shows oromaneal events and holding modes. Yellow boxed region  
409 (right) highlights one example of an oromaneal event.

410 (C) Traces of corresponding electrophysiological activity, showing bursts of firing associated with  
411 oromaneal events. Top: plot of firing rate for a single unit recorded on one channel. Inset: Example  
412 single unit. Middle: raster plot of spiking recorded on multiple channels on the same probe.  
413 Bottom: average firing rate across all units recorded on the same probe.

414

415

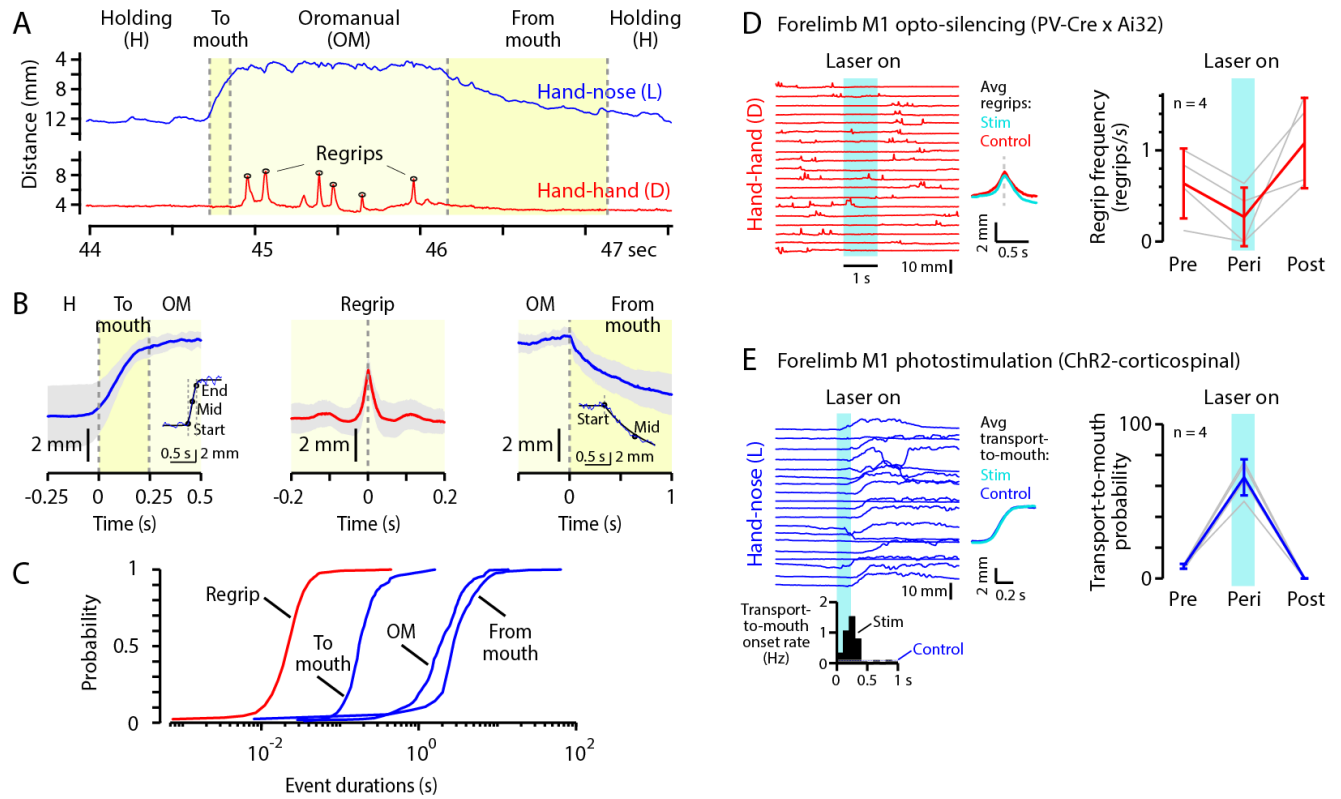

416

417 **Fig. 2: Kinematic composition of oromaneal events**

418 (A) Example of an oromaneal event (last event in the example shown in Fig. 1), characterized by  
 419 a rapid transport-to-mouth movement, multiple regrips during the oromaneal period, and a slower  
 420 lowering-from-mouth movement.

421 (B) Plots show event-alignment and averaging of different features of the oromaneal events. Left:  
 422 Average transport-to-mouth movement, aligned to the onset of the change in L. Error bands  
 423 indicate mean  $\pm$  s.d for  $n = 9$  mice. Inset shows an example of fitting a curve to identify the start,  
 424 middle, and end points of the transport-to-mouth movement (**Methods**). Middle: Average regrip,  
 425 aligned to the peak of the spike in D. Right: Average lowering-from-mouth movement, aligned to  
 426 the onset of the change in L. Inset shows an example of curve-fitting to identify the key time points  
 427 of the lowering-from-mouth movement.

428 (C) Cumulative probability plots of the durations of regrips, transport-to-mouth movements,  
429 oromanual durations, and lowering-from-mouth movements. Note semi-log scale.

430 (D) Left: Example D traces from an optogenetic silencing experiment. Blue bar represents the  
431 duration of the laser stimulus. The two traces to the right show the average regrip trajectories  
432 between silencing trials (red,  $n = 4$  mice) and during silencing trials (cyan,  $n = 2$  mice with regrips  
433 during silencing). Right: Frequency of regrips during oromanual events in the 2 seconds before  
434 ('Pre'), 1 second during ('Peri'), and 2 seconds after ('Post') silencing. Thin grey lines are  
435 individual mice ( $n = 4$ ) and thick red error bars are mean  $\pm$  s.d. over mice.

436 (E) Left: Example L traces from an optogenetic stimulation experiment. Blue bar represents the  
437 duration of the laser stimulus. The peristimulus time histogram below shows the rate of transport-  
438 to-mouth movements in 100 ms bins following stimulus onset when stimulation was delivered  
439 during holding for  $n = 4$  mice, with the background rate ('Control') indicated by thin horizontal  
440 lines (blue dashed line: mean, solid grey lines: s.d.). The two traces to the right show the average  
441 transport-to-mouth trajectories immediately following stimulation (cyan) and at all other times  
442 (blue). Right: probability of observing a transport-to-mouth movement within 400 ms of stimulus  
443 onset ('Peri') compared to virtual stimulus timings shifted one second earlier ('Pre') or later  
444 ('Post'). Only trials where the stimulus (real or virtual) occurred during holding are included. Thin  
445 grey lines are individual mice ( $n = 4$ ) and thick blue error bars are mean  $\pm$  s.d. over mice.

446



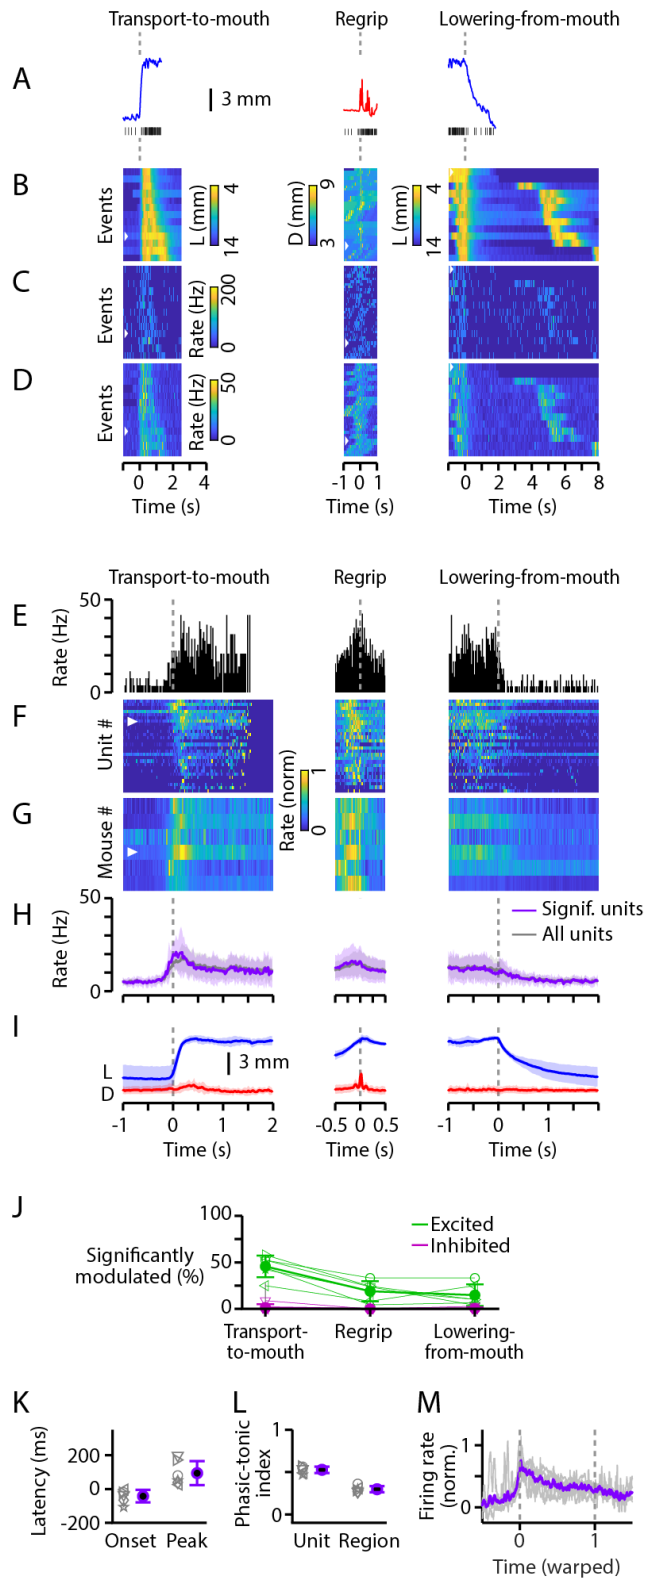

447

448 **Fig. 3: Phasic-tonic oromanual-related activity in forelimb M1**

449 (A) Traces of L (blue, reverse y-axis) for an example transport-to-mouth movement (left), D (red)  
450 for an example regrip (middle), and L for an example lowering-from-mouth movement (right).  
451 (B) Heatmap of all peri-oromaneal event traces of kinematics for the same experiment as in (A).  
452 Left: Map of L (inverse color scale), aligned to the transport-to-mouth onset, sorted by oromaneal  
453 event duration. Middle: Map of D, aligned to regrips, sorted by latency. Right: Map of L, aligned  
454 to lowering-from-mouth onset and sorted by holding interval duration. White arrows denote the  
455 corresponding events in (A).  
456 (C) Same as (B) for an example forelimb M1 single unit.  
457 (D) Same as (B) for the average firing rate of all active units recorded from forelimb M1 in the  
458 example experiment.  
459 (E) Peri-event time histograms (PETHs) for the example single unit in (C).  
460 (F) Peak-normalized PETHs of all significantly modulated (see **Methods**) active units recorded in  
461 the same experiment, plotted as a heatmap. White arrow denotes the example single unit in (C)  
462 and (E).  
463 (G) Average peak-normalized event-aligned firing rates across significantly modulated forelimb  
464 M1 active units and across experiments for all mice with forelimb M1 recordings ( $n = 6$ ).  
465 (H) Mouse-average event-aligned firing rates (shaded region, mean  $\pm$  s.d.) for all units (grey) and  
466 only significantly modulated units (purple).  
467 (I) Mouse-average event-aligned L (blue, reverse y axis) and D (red) traces.  
468 (J) Percentages of forelimb M1 active units significantly excited (green) or inhibited (purple) for  
469 each event type. Thin lines are means over experiments for individual mice, thick lines and error  
470 bars are mean  $\pm$  s.d. over mice.

471 (K) Onset and peak latencies for active units in forelimb M1. Grey symbols are means over  
472 simultaneously recorded units and then experiments for individual mice, purple symbols and error  
473 bars are means  $\pm$  s.d. over mice.

474 (L) Phasic-tonic indices (PTIs, see **Methods**) for forelimb M1 active units (“Unit”) and average  
475 firing rate traces (“Region”). Grey symbols are means over experiments (after first averaging over  
476 simultaneously recorded units for Unit PTIs) for individual mice, purple symbols and error bars  
477 are mean  $\pm$  s.d. over mice.

478 (M) Normalized average forelimb M1 firing rate traces after time-warping each oromanual event  
479 to have the same duration. Thin lines are means over experiments for each mouse and thick lines  
480 are mean over mice.

481

482

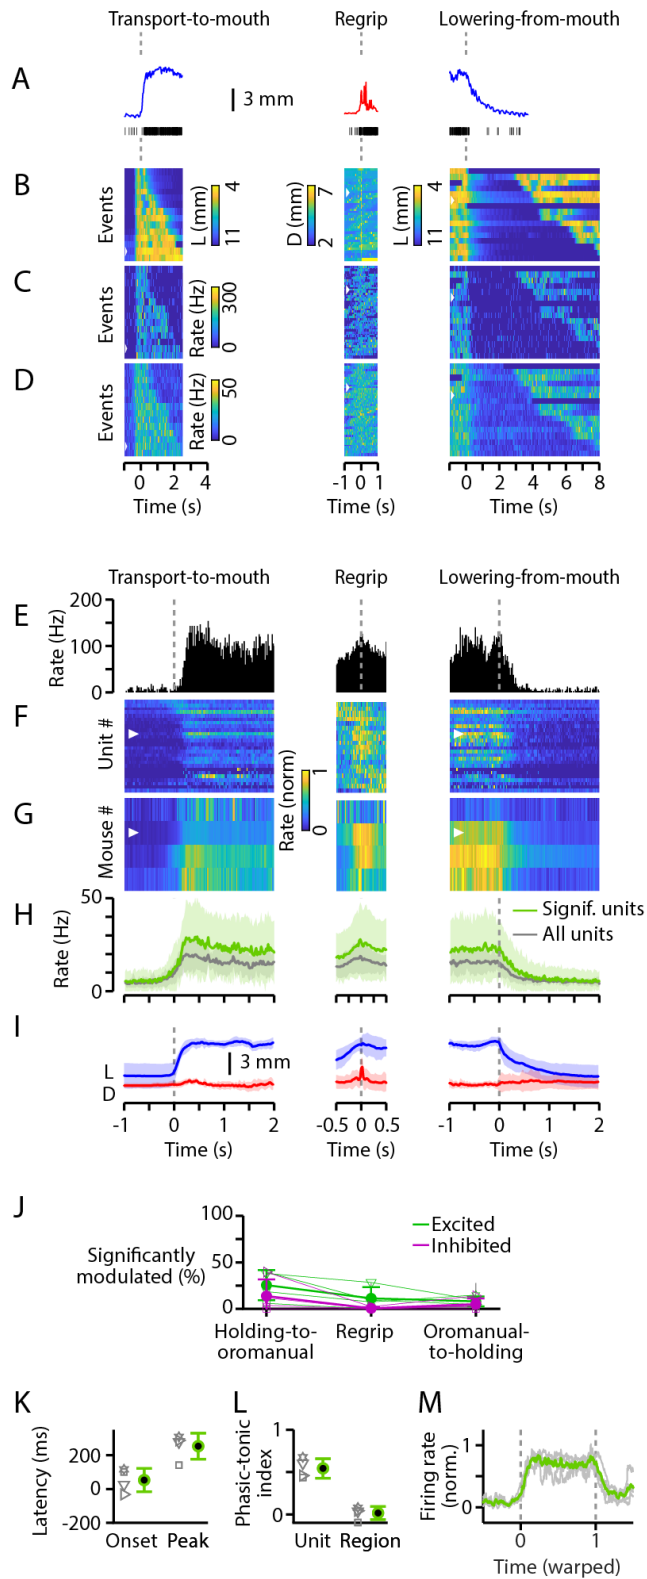

483

484 **Fig. 4: Tonic oromaneural-associated activity in tongue/jaw M1**

485 As Fig. 3, but for all tongue/jaw M1 recordings ( $n = 4$ ).

486

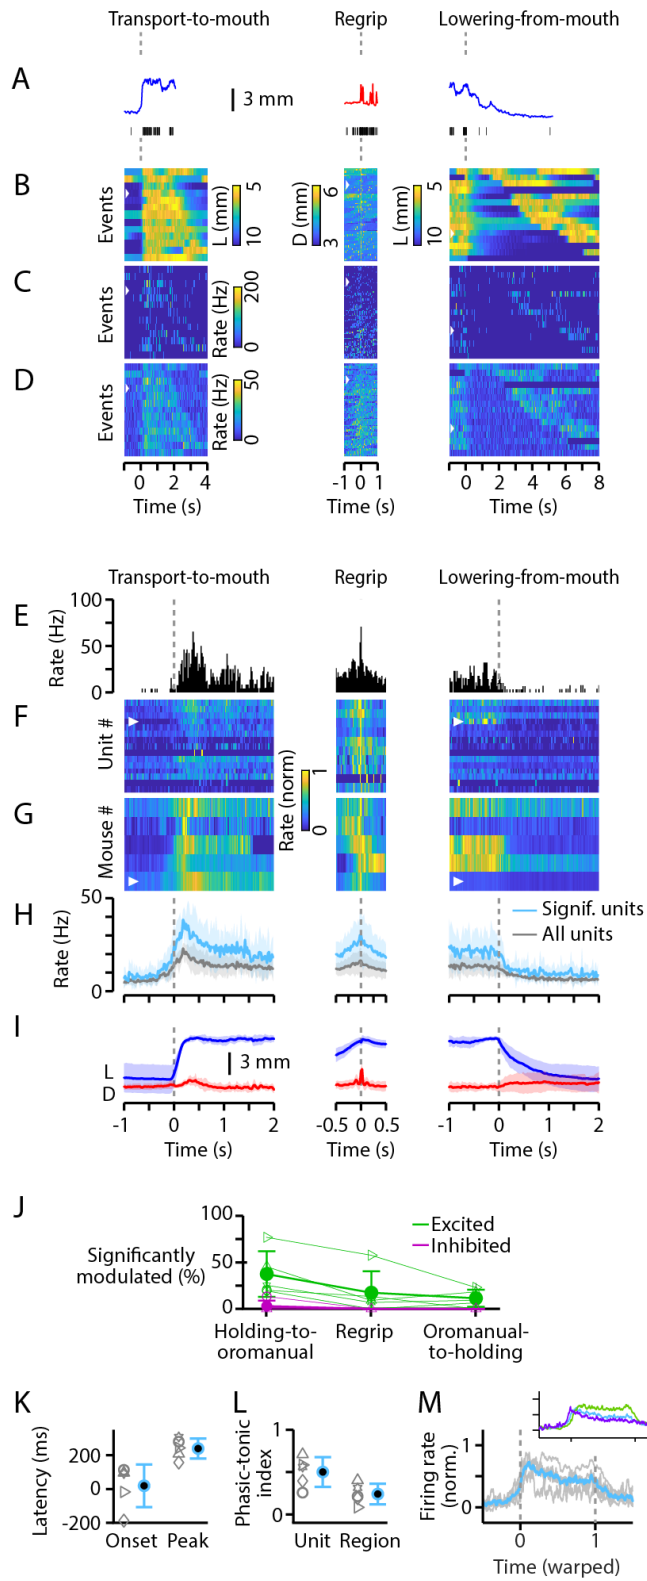

487

488 **Fig. 5: Tonic oromaneural-associated activity in forelimb S1**

489 As Fig. 3, but for all forelimb S1 recordings ( $n = 5$ ). Inset in (N) shows mouse-average time-  
490 warped firing rate traces for all three regions on the same axis (purple, forelimb M1; green,  
491 tongue/jaw M1; teal, forelimb S1).

492

493

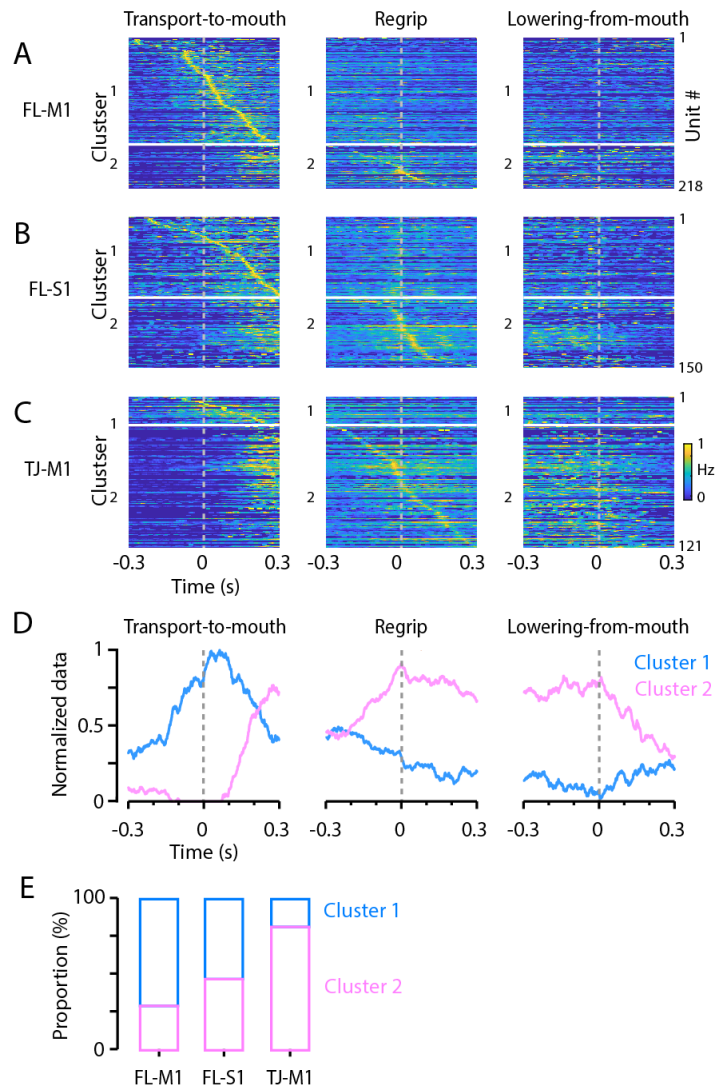

494

495 **Fig. 6: Phasic and tonic activity classes within and across areas**

496 (A) Forelimb M1 unit activity normalized to maximum firing rate, aligned to transport-to-mouth  
497 (left), regrip (middle), and lowering-from-mouth (right) movements, and sorted by time of peak  
498 firing around transport-to-mouth movements for cluster 1 and regrips for cluster 2. Neurons were  
499 assigned to two clusters by applying NNMF to pooled data from all three areas.

500 (B, C) Same as (A), for forelimb S1 and tongue/jaw M1, respectively.

501 (D) NNMF factor weights for the two clusters.

502 (E) Proportions of cluster 1 and 2 units for each area.

503

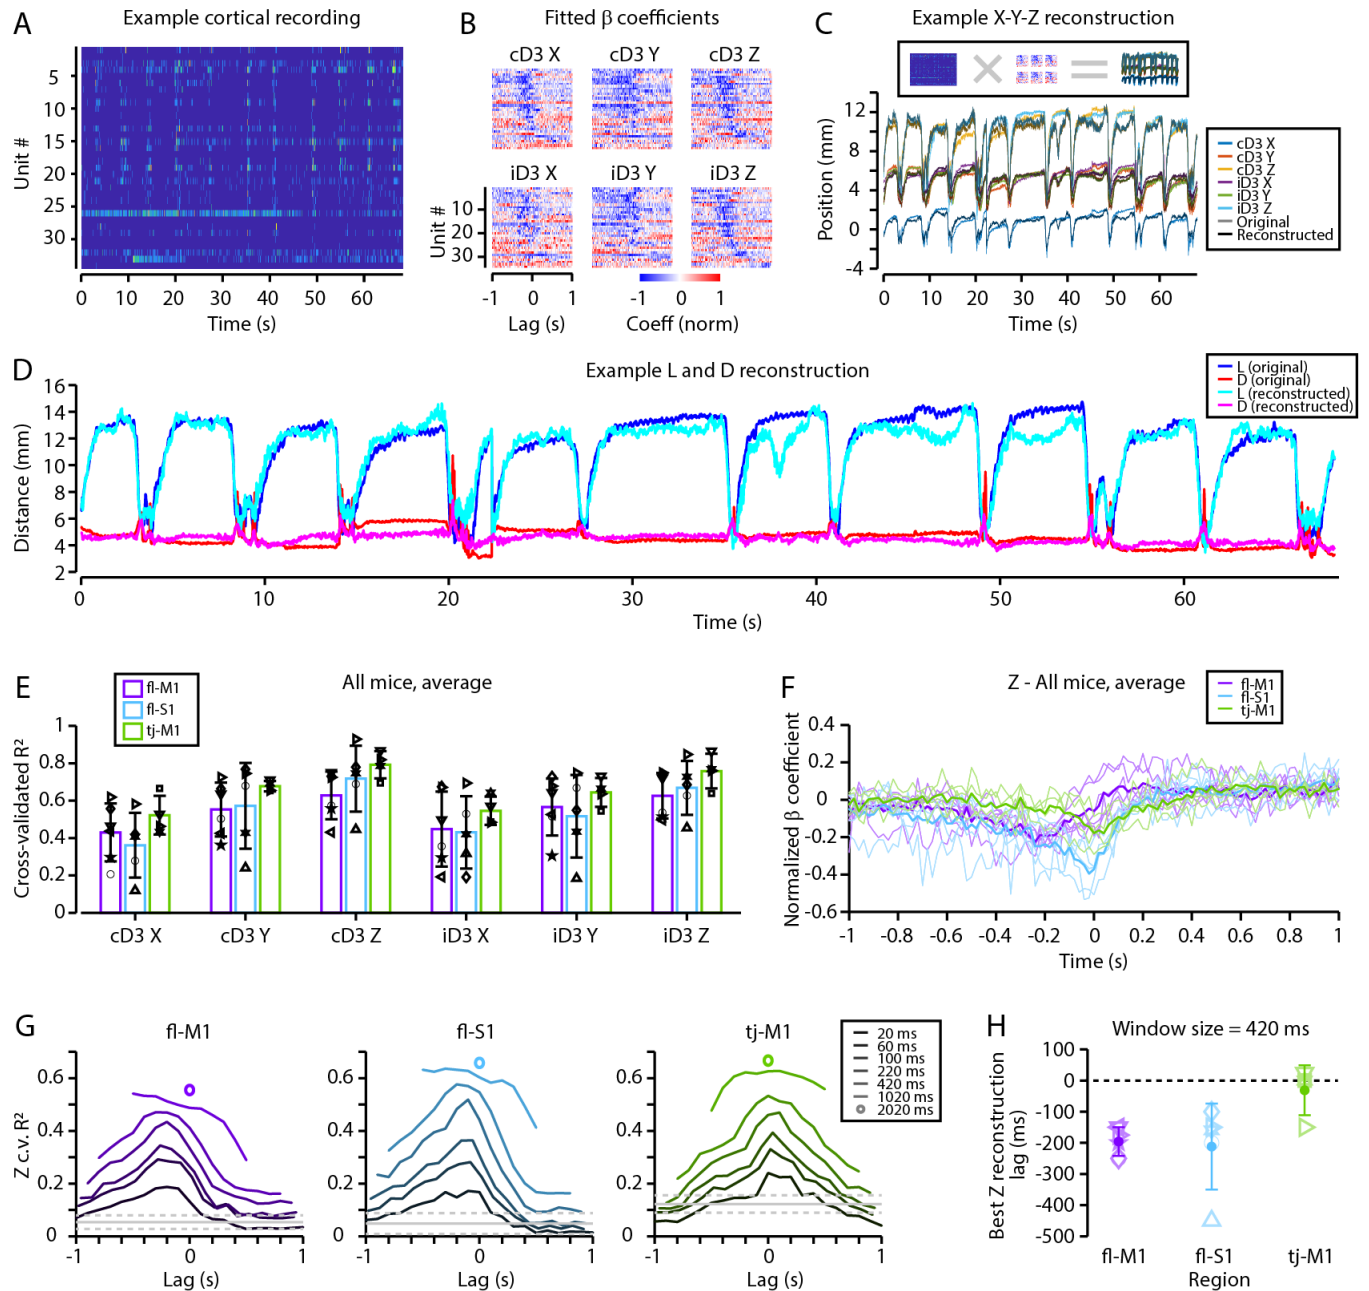

504

505

506 **Fig. 7: Hand position during food handling can be accurately decoded from cortical spiking**

507 **activity**

508 (A) Example raster showing all active units from a forelimb M1 recording.

509 (B) To reconstruct kinematics, a ridge-regularized general linear model (GLM) was fit to the X,

510 Y, and Z coordinates of each hand (cD3: contralateral third digit (D3), iD3: ipsilateral D3) using



511 2.02-second sliding windows of firing activity. The corresponding fitted GLM coefficients from  
512 the recording in (A), normalized to range [-1, 1] are shown. Active units are ordered by time-to-  
513 trough of the contralateral D3 Z coefficients.

514 (C) X, Y, and Z hand trajectories (lighter colors) for the same example recording shown in (A-B)  
515 and the corresponding reconstructed trajectories (darker colors).

516 (D) L (blue) and D (red) traces from the recording in (A-C) compared to L (cyan) and D (magenta)  
517 traces calculated from the reconstructed hand trajectories.

518 (E) Cross-validated reconstruction accuracy (c.v.  $R^2$ ) for each coordinate and region (purple:  
519 forelimb M1, teal: forelimb S1, green: tongue/jaw M1). Error bars are mean  $\pm$  s.d over mice.  
520 Symbols are averages over experiments for individual mice.

521 (F) GLM coefficients normalized to the range [-1,1] for the Z-coordinate GLMs averaged over  
522 neurons, experiments, hands, and mice for forelimb M1 (purple), forelimb S1 (teal), and  
523 tongue/jaw M1 (green). Thin lines are individual mice, thick lines are mean over mice.

524 (G) Mouse-average c.v.  $R^2$  for the Z-coordinate (averaged over ipsi- and contralateral hands) when  
525 varying the size and central lag of the window used for reconstruction. Solid grey lines indicate  
526 reconstruction accuracy expected by chance, dashed lines are mean  $\pm$  2 s.d. over shuffles of the  
527 chance reconstruction accuracy. Data for all coordinates are shown in Fig. S3.

528 (H) Lag giving the highest hand-average Z-coordinate c.v.  $R^2$  for the 420 ms window as a function  
529 of region. Symbols are averages over experiments for individual mice, error bars are mean  $\pm$  s.d.  
530 over mice.

531

532

533 **SUPPLEMENTARY FIGURES**

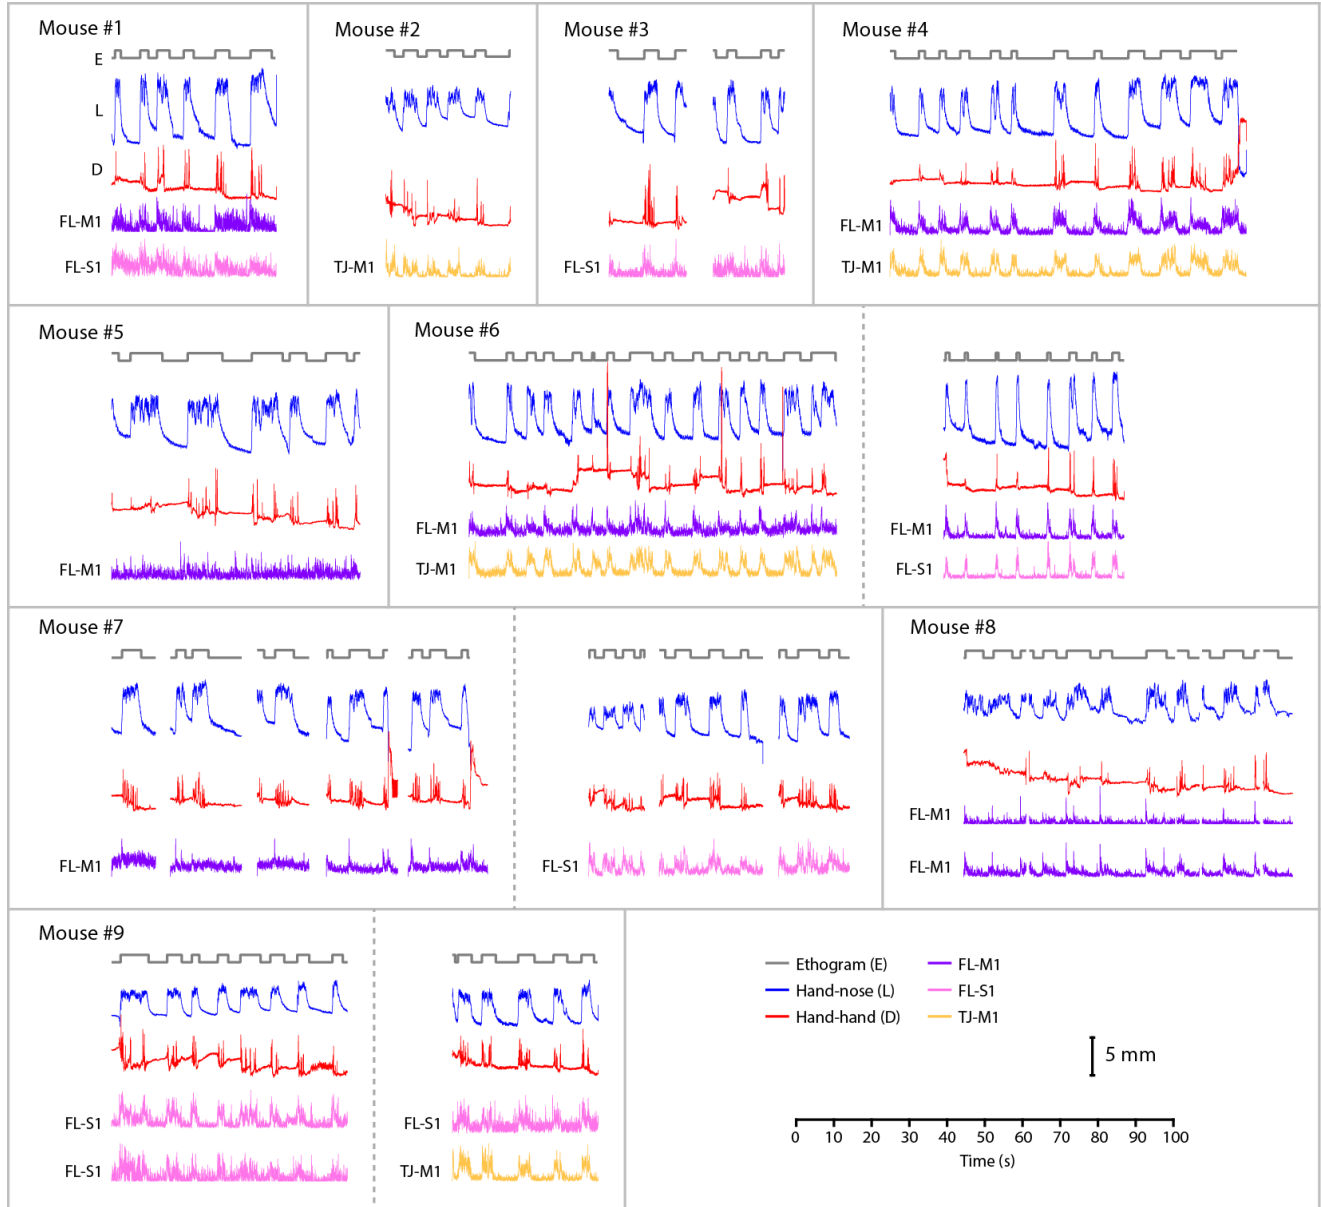

534

535 **Fig. S1: Traces of kinematic parameters and firing rates.**

536 Traces of kinematic parameters and firing rates are shown for one or more representative recording  
537 sessions for each mouse. Each recording session is of the handling of one food item. Mice were  
538 often recorded over multiple days (indicated by vertical dashed lines), each with multiple sessions.  
539 Probes were reinserted anew on subsequent days.

540

541

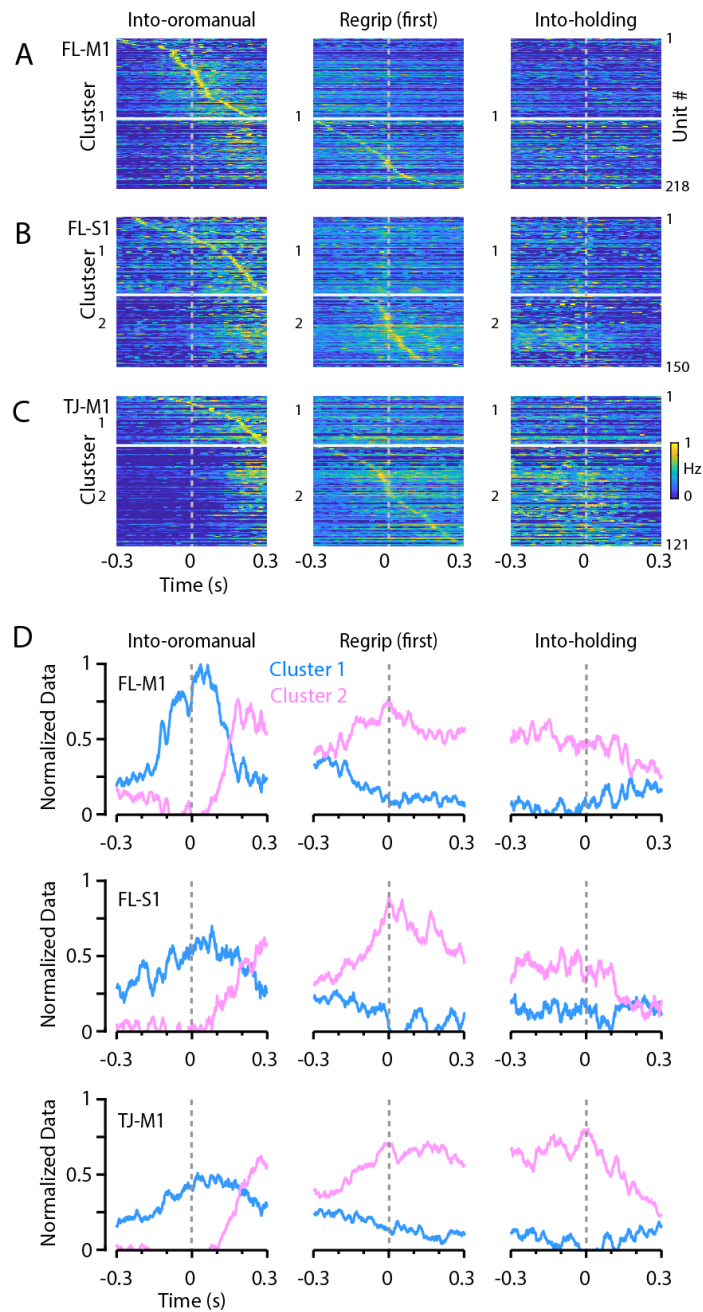

542

543

544 **Fig. S2: Phasic and tonic activity classes within and across areas, based on applying NNMF**

545 **to data from each area individually**

546 (A) Forelimb M1 unit activity, aligned to the transport-to-mouth movement (left), first regrips

547 (middle), and lowering-from-mouth movement (right). Data were normalized to each unit's

548 maximum average firing rate and sorted by time of peak firing around the transport-to-mouth  
549 movement for cluster 1 and time of peak firing around the first regrip for cluster 2. Two clusters  
550 identified by NNMF are indicated.

551 (B) Same as (A), for forelimb S1. Units were sorted by time of peak firing around the transport-  
552 to-mouth movement

553 (C) Same as (A), for tongue/jaw M1.

554 (D) Plots showing the NNMF factor weights for the clusters found in forelimb M1 (top), forelimb  
555 S1 (middle), and tongue/jaw M1 (bottom).

556

557

558

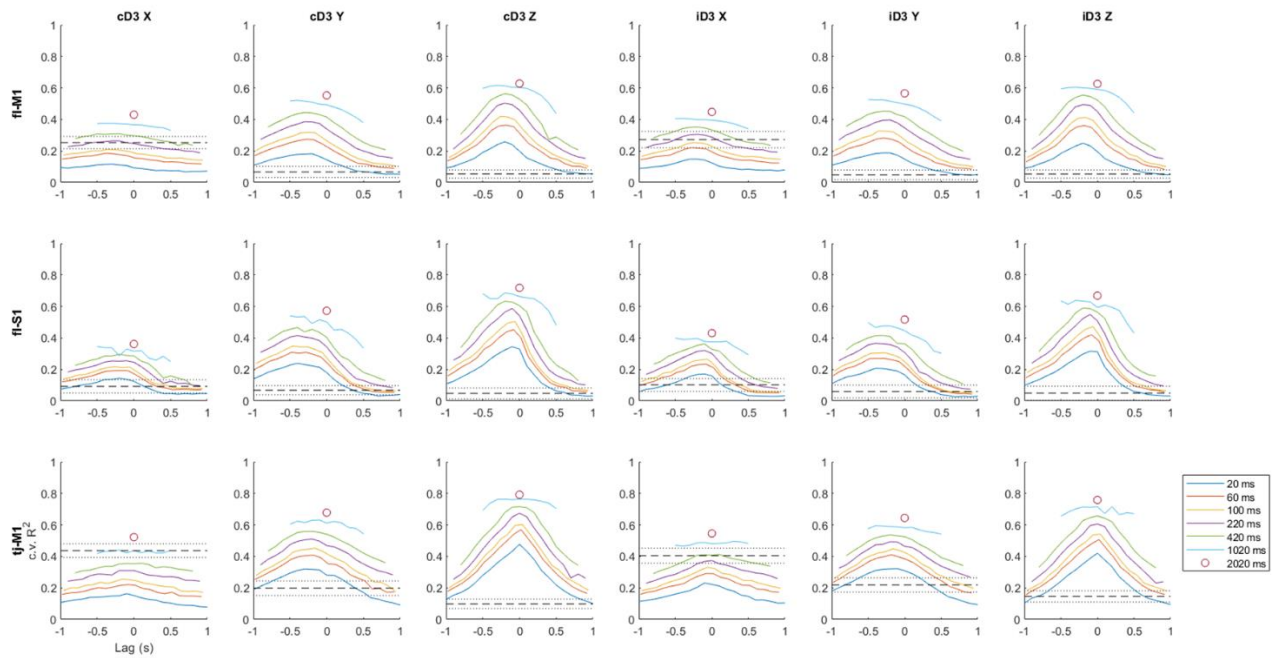

559

560 **Fig. S3: Additional GLM modeling results.**

561 Plots show the c.v.  $R^2$ , averaged over mice, for the X-, Y-, and Z-coordinates of the ipsilateral (i-)  
562 and contralateral (c-) third digits (D3), for each of the three cortical areas, when varying the size  
563 and central lag of the window used for reconstruction. Dashed lines indicate reconstruction  
564 accuracy expected by chance, dotted lines are mean  $\pm$  2 s.d. over shuffles of the chance  
565 reconstruction accuracy.

566

567

568 **VIDEOS**

569

570 **Video 1:** Example video segment featuring two oromanual events.

571

572 **Video 2:** Part of Video 1 slowed down to one-tenth speed, with tracking added. The DeepLabCut-  
573 tracked position of the nose is indicated by blue circles and each hand by red circles. The derived  
574 hand-hand (D) and hand-nose (L) distances are indicated by red and blue lines, respectively.

575

576 **Video 3:** Example oromanual event with optogenetic silencing, slowed to one-tenth speed. Current  
577 behavioral mode, laser state, and regrips are noted.

578

579 **Video 4:** Example spontaneous transport-to-mouth movement, slowed to one-tenth speed,  
580 followed by a transport-to-mouth movement evoked by corticospinal stimulation. Movement and  
581 laser onsets are noted.

582

583 **MATERIALS AND METHODS**

584

585 **Animals**

586 This study used experimentally naïve mice on a C57BL/6 background (stock no. 000664,  
587 The Jackson Laboratory, Bar Harbor, Maine) aged 111-284 days postnatal and weighing 17.4-24.6  
588 g at the time of recording (19.5-28.1 g before food restriction, **Table 1**). For optogenetic silencing  
589 experiments, Ai32xPV-cre mice were generated by crossing homozygous B6.Cg-  
590 Gt(ROSA)26Sortm32(CAG-COP4\*H134R/EYFP)Hze/J cre-dependent channelrhodospin2

591 (ChR2) reporter mice (stock no. 024109, The Jackson Laboratory) (Madisen et al., 2012) with  
592 homozygous B6.129P2-Pvalbtm1(cre)Arbr/J mice (stock no. 017320, The Jackson Laboratory)  
593 (Hippenmeyer et al., 2005) that express cre in parvalbumin (PV) expressing cells. Ai32xPV-cre  
594 mice thus express ChR2 in all PV-positive cells, including PV-positive interneurons in cortex, and  
595 so can be used for local silencing of cortex (Li et al., 2019). Mice of both sexes were used,  
596 consistent with NIH policy on sex as a biological variable in basic research. Mice were bred in-  
597 house, housed in groups with a 12 hour reverse light/dark cycle, and had free access to food and  
598 water prior to food restriction (see below). All experiments were conducted during the dark phase  
599 of the mice's light cycle. Mice were used as they became available. As many brain regions as  
600 possible (of the total of six bilateral representations of the three areas of interest) were recorded  
601 from each mouse, hence no randomization to cohorts was necessary. All studies of mice were  
602 approved by the Northwestern University IACUC and fully complied with the animal welfare  
603 guidelines of the National Institutes of Health and Society for Neuroscience.

604

## 605 **Surgical procedures**

606 *Head-bar mounting.* Under deep isoflurane anesthesia, mice were placed in a stereotaxic  
607 frame (Model 900, David Kopf Instruments, Tujunga, CA) and a ~1 cm<sup>2</sup> circular incision was  
608 made to expose the cranium. The periosteum was removed and a titanium head-fixation bar (0.875  
609 × 0.187 inches, cut by water-jet from 0.08 inch Ti-6Al-4V sheet, Big Blue Saw, Atlanta, GA) was  
610 placed on top of lambda, perpendicular to the central suture, and affixed using dental cement (C&B  
611 Metabond, Parkell, Edgewood, NY). The incision was then sutured to close the wound margins  
612 and cover any exposed cranium not covered by dental cement and/or the head-bar. Mice were  
613 given 0.3 mg/kg buprenorphine preoperatively and 1.5 mg/kg meloxicam postoperatively as

614 analgesia, followed by a second dose of meloxicam 24 hours after surgery. Mice were single-  
615 housed following head-bar mounting.

616 *Retrograde labeling of corticospinal neurons.* For optogenetic stimulation of corticospinal  
617 neurons, pAAVretro-syn-ChR2(H134R)-GFP (#58880, Addgene, Watertown, MA) (Tervo et al.,  
618 2016) was injected into the spinal cord as previously described (Yamawaki et al., 2021) at the  
619 same time as head-bar mounting. Laminectomies were performed at cervical level 6. Injection  
620 pipettes were fabricated from glass capillary micropipettes (Wiretrol II, Drummond Scientific  
621 Company, Broomall, PA) using a pipette puller (PP-830, Narishige, Tokyo, Japan) and beveled to  
622 a sharp edge with a microgrinder (EG-400, Narishige). Pipettes were back-filled with mineral oil,  
623 tip-filled with virus, and advanced to the spinal cord using a 3-axis digital manipulator (51906,  
624 Stoelting, Wood Dale, IL). The dura was punctured and virus injected at 10 nL/min 0.4 mL lateral  
625 to midline at depths of 0.6 and 0.4 mm using a one-axis oil hydraulic micromanipulator (MO-10,  
626 Narishige) to a total volume of 80 nL.

627 *Craniotomies for linear arrays.* One day prior to recording, mice were deeply anaesthetized  
628 with a cocktail of 80–100 mg/kg ketamine and 5–15 mg/kg xylazine injected intraperitoneally. A  
629 craniotomy or craniotomies were opened over the area(s) to be recorded using a dental drill (EXL-  
630 M40, Osada, Los Angeles, CA). The cortical surface was covered with Kwik-Sil (World Precision  
631 Instruments, Sarasota, FL) and mice were allowed to recover.

632

### 633 **Behavioral training**

634 At least 3 days post-surgery, mice were food restricted to motivate feeding behavior. Mice  
635 were fed a measured amount of standard rodent diet each day to maintain their weight between 85  
636 and 90% of pre-restriction body weight. At the time of recording mouse weights were 85.1-91.5%



637 of initial body weight. Mice were monitored throughout the food restriction period for signs of ill-  
638 health (Guo et al., 2014), and body condition scores (Ullman-Cullere and Foltz, 1999) were taken  
639 each day. No signs of ill-health were observed and no mouse fell below a body condition score of  
640 3 throughout the study.

641 The experimental apparatus comprised a raised platform on which a 3D-printed hut was  
642 placed for the mouse to sit in, head-bar holders with screw clamps, and a pellet dispensing tube.  
643 The hut was designed to have an arched profile to facilitate the hunched posture typically adopted  
644 by mice while eating by providing more room for the back to arch, while also being easy to 3D-  
645 print. It also incorporated an arm bar for the mice to rest their hands on when not eating. The height  
646 of the platform was adjustable to enable a comfortable posture for each mouse. Accordingly, the  
647 position of the arm bar below the head varied from mouse to mouse and in some cases during  
648 holding intervals (particularly those of long duration) mice would rest the forearms on the arm bar.  
649 Mice generally did not use the arm bar for support during bimanual oromanual events, however.

650 Starting 1 to 3 days after beginning food restriction, mice were familiarized with the  
651 experimenter and head-fixation apparatus following standard procedures (Guo et al., 2014).  
652 Briefly, mice were first acclimatized to handling by the experimenter, then introduced to the  
653 experimental apparatus. Food rewards (20 mg dustless precision grain pellets, Bio-Serv,  
654 Flemington, NJ) were presented to the mice from the dispensing tube. Once mice consistently ate  
655 from the tube, they were introduced first to gentle head-fixation by hand, then to full head-fixation.  
656 Video and electrophysiological recordings were taken after four to six weeks of habituation, by  
657 which time mice were able to comfortably and consistently retrieve, handle, and consume pellets  
658 from the dispenser while head-fixed. For experimental recordings, the head-fixed mice were given

659 black oil sunflower seeds (shells removed) or large grain pellets (45 mg, Bio-Serv), presented by  
660 spoon, as these larger food items facilitated longer duration recordings.

661

## 662 **Videography and kinematic analysis**

663 Videos were obtained with a high-speed CMOS-based monochrome video camera  
664 (Phantom VEO 710L, Vision Research, Wayne, NJ). Videos were acquired at 1000 frames per  
665 second (fps), 999.6  $\mu$ s exposure time, and 1024  $\times$  512 pixel field of view. Two oblique views of  
666 the mouse were obtained by mounting two 50  $\times$  50 mm flat enhanced aluminum surface mirrors  
667 (#43-876, Edmund Optics, Barrington, NJ) and a 50 mm anti-reflection coated equilateral prism  
668 (#49-435, Edmund Optics) in the camera optical path. A prime lens (Nikon AF Micro-NIKKOR  
669 60mm f/2.8D, Nikon, Tokyo, Japan) was mounted on the camera body. The mouse was illuminated  
670 from both sides and slightly below using two red LEDs (M660L1 and MLEDC25, ThorLabs,  
671 Newton, NJ). Camera and video recording settings were controlled with Phantom Camera Control  
672 Application v3.5 (Vision Research). Video was recorded to the camera memory and then saved to  
673 disk as uncompressed Phantom Cine files, later converted to H.264-encoded MP4 files. Video  
674 recording was triggered by a TTL pulse delivered from an NI USB-6229 data acquisition board  
675 (National Instruments, Austin, TX).

676 Videos were cropped to isolate each view using ffmpeg (ffmpeg.org) and then markerless  
677 tracking of the nose, digits, and jaw was performed using DeepLabCut (Mathis et al., 2018) as  
678 described (Barrett et al., 2020). From these two sets of 2D trajectories for each body part, 3D  
679 trajectories were reconstructed using Anipose (Karashchuk et al., 2020). Anipose's camera model  
680 was calibrated for each experimental session using videos of a ChAruCo board at various angles  
681 captured at the end of the session without adjusting the lens settings.

682

### 683 **Ethogramming**

684       Using the DeepLabCut-extracted and Anipose-reconstructed trajectories, each video was  
685 temporally parsed into holding, oromaneal, and other postural modes based on the distance  
686 between the third digit (D3) of each hand and the nose. Two thresholds were set for each hand,  
687 one dividing the oromaneal events from holding intervals, and one dividing holding intervals from  
688 non-food-handling related behavior (e.g. resting the hand on the arm bar). Video frames were  
689 assigned to holding intervals when both hands were in holding and to oromaneal events when both  
690 were in oromaneal. In the case of a slight delay in one hand crossing the oromaneal threshold  
691 relative to the other, the threshold crossing time was set to the mean of the threshold crossing times  
692 for the two hands. Brief mode transitions due to fluctuations about the threshold were removed.  
693 Thresholds for each hand and minimum mode duration for inclusion were set manually per video  
694 based on visual inspection of the hand-nose distance traces and resulting ethogram. Periods of  
695 unimanual behavior (one hand in holding/oromaneal and the other at rest) were uncommon and  
696 excluded from analysis, as were periods where both hands were at rest or where the tracking was  
697 poor.

698       Having constructed a rough three-mode ethogram (oromaneal/holding/other) based on  
699 threshold crossings, we then calculated the hand-hand distance  $D$  as the distance between the D3s  
700 of each hand and the bimanual hand-nose distance  $L$  as the distance between the nose and the  
701 midpoint of both D3s. The latter was used to more precisely determine the timing of each transition  
702 movement (transport-to-mouth and lowering-from-mouth) by fitting model functions to the  
703 corresponding  $L$  trace. For each threshold crossing, the segment of the  $L$  trace from halfway to the  
704 previous threshold crossing to halfway to the next crossing was taken for fitting. Model functions

705 were chosen to approximate the characteristic shape of each movement. Transport-to-mouth  
706 movements appeared roughly sigmoidal and so were fit with an inverted Gaussian cumulative  
707 distribution function:

$$708 \quad L(t) = a - \frac{b}{\sigma\sqrt{2\pi}} e^{-\frac{1}{2}\left(\frac{t-\mu}{\sigma}\right)^2}$$

709 Transitions into the holding mode appeared to decay exponentially, so were fit with:

$$710 \quad L(t) = bH(t - \mu) \left(1 - e^{-\frac{\mu-t}{\sigma}}\right) + a$$

711 where  $H(x)$  is the Heaviside step function. In both cases, the parameters fit for each movement  
712 were the scale  $b$ , the offset  $a$ , the location  $\mu$ , and the rate  $\sigma$ . Both models generally gave a good fit  
713 to the data (lowering-from-mouth:  $R^2 = 95.8 \pm 13.1\%$ , median  $\pm$  m.a.d.,  $n = 192$  movements from  
714 all videos; transport-to-mouth:  $R^2 = 95.6 \pm 8.2\%$ , median  $\pm$  m.a.d.,  $n = 176$  movements). For  
715 transport-to-mouth movements, the start and end of the movement were defined as the 80%  
716 confidence interval of the Gaussian fit (i.e., from 10% to 90% of the movement height below the  
717 baseline) and the amplitude was taken as the difference in the values of  $L$  at the edges of the 98%  
718 confidence interval. For lowering-from-mouth movements, the start was defined as  $\mu$ , the end as  
719 the time of 99% decay, and the amplitude was the difference in the values  $L$  at those times. Mode  
720 durations were calculated from the time of the start of the movement transitioning into the mode  
721 to the time of the movement transitioning out. A new ethogram was constructed for each video  
722 using the start times extracted from the fitted models and this ethogram was used in all subsequent  
723 analyses.

724 Regrips were detected using the findpeaks function in the Matlab Signal Processing  
725 Toolbox as peaks in  $D$  with minimum prominence of 0.75 mm and a slope that exceeded  $88 \text{ mm} \cdot \text{s}^{-1}$   
726 <sup>1</sup> in either direction (Barrett et al., 2020). The regrip peak height was defined as the difference

727 between the value of D at the peak and the mean value during the pre- and post-regrip baselines,  
728 which were taken from 300 ms to 100 ms before and 100 ms to 300 ms after the regrip. The full-  
729 width at half maximum was defined as the width of the peak at halfway between baseline and the  
730 peak value. First regrip latency was defined as the time of the first regrip in a given oromanual  
731 event less the end time of the transport-to-mouth movement into said oromanual event. Peak  
732 parameters were extracted for individual regrips, before averaging first within and then across  
733 mice.

734

### 735 **Electrophysiological recordings and analysis**

736 The linear arrays used were 32-channel silicon probes with  $\sim 1$  M $\Omega$  impedance and 50- $\mu$ m  
737 spacing (model A1 $\times$ 32-15mm-50-177-A32, NeuroNexus, Ann Arbor, MI), in linear configuration.  
738 Each probe was mounted on a linear translator (MTSA1, ThorLabs) that was in turn mounted on  
739 a 3-axis manipulator (MP285, Sutter, Novato, CA). Probes were positioned at the recording sites  
740 stereotactically based on the stereoscopically visualized location of bregma using the three axes of  
741 the Sutter manipulator, then slowly inserted into the cortex using the linear translator at a rate of 2  
742  $\mu$ m/s (controlled by software) to a nominal depth of 1,600  $\mu$ m from the pia. Target coordinates for  
743 the three regions were as follows. Forelimb M1: 0.0 mm anterior-posterior (AP), 1.5 mm medial-  
744 lateral (ML) (Yamawaki et al., 2021); tongue/jaw M1: 1.8 AP, 2.5 ML (Mayrhofer et al., 2019);  
745 forelimb S1: 0.0 mm AP, 2.4 ML. For lateral recording sites (forelimb S1 and tongue/jaw M1),  
746 the probes were tilted by  $\sim 30^\circ$  off the vertical axis for alignment with the radial axis of the cortex.  
747 For forelimb M1, the probes were inserted perpendicularly to the horizontal plane (for unilateral  
748 recordings) or  $\sim 15^\circ$  off the vertical (for bilateral recordings, to avoid headstage collision). At the

749 end of each experiment, the probes were removed, the craniotomy re-sealed with Kwik-Sil, and  
750 the mouse returned to its home cage.

751 Signals were amplified using RHD2132 headstages (Intan Technologies, Los Angeles, CA)  
752 and acquired at 30 kHz using an RHD2000 USB Interface Evaluation Board (Intan). Data was  
753 recorded using the Intan experimental interface evaluation software, triggered by the same trigger  
754 used to control video recording. To synchronize videos to electrophysiological recordings, the  
755 frame sync signal from the camera was recorded as a digital input to the RHD2000. RHD files  
756 recorded by the Intan software were converted to raw format using Matlab (The MathWorks,  
757 Natick, MA), from which spikes were detected and sorted using Kilosort (Pachitariu et al., 2016;  
758 Steinmetz et al., 2021). Results from Kilosort were manually verified using phy  
759 (<https://github.com/cortex-lab/phy>) as follows. Units with waveforms spanning more than 3  
760 adjacent channels or with atypical waveform shapes were rejected as artifactual. Units displaying  
761 a clear refractory period (<1% of spikes within 1 ms) were classified as single units. All other units  
762 were classified as multiunits. Multiunits on the same channel with similar waveform shapes were  
763 merged. Single units were merged only if they were on the same channel, displayed similar shapes,  
764 and had no spikes in +/- 1 ms in their crosscorrelogram (Hall et al., 2021). Single units and  
765 multiunits (“active units”) were included in all analyses presented. Only data from probe  
766 recordings from which at least 10 active units could be isolated were included.

767

## 768 **Optogenetics**

769 The laser-scanning photostimulation apparatus used for optogenetic silencing and  
770 stimulation experiments has been described in detail elsewhere (Jiang et al., 2018; Jiang et al.,  
771 2019). Briefly, 473 nm wavelength light from a blue laser source (LY473III-100, Aimlaser, Xi’an,

772 China) was directed through an acousto-optic modulator (AOM, MTS110-A3-VIS, AA Opto-  
773 Electronic, Orsay, France) and an iris (SM1D12D, ThorLabs) before being deflected by a pair of  
774 galvanometer scan mirrors (GVSM002, ThorLabs) and focused onto the brain by a plano-convex  
775 spherical lens (LA1484-A, ThorLabs).

776 Laser power and location were controlled by sending voltage commands to the AOM and  
777 scan mirrors, respectively, from a NI USB-6229 data acquisition board controlled by WaveSurfer  
778 0.945 (<https://wavesurfer.janelia.org/>). Bilateral forelimb M1 silencing was achieved by  
779 commanding the scan mirrors to rapidly direct the laser beam back and forth between right and  
780 left forelimb M1 for one second at 40 Hz, with the AOM command voltage set to zero while the  
781 mirrors were moving to avoid stimulating more medial areas (Morandell and Huber, 2017). For  
782 unilateral forelimb M1 corticospinal stimulation, the laser beam was directed to the expression site  
783 and pulsed at 40 Hz (20% duty cycle) for 250 ms (longer duration stimuli were used for one mouse,  
784 but the results were similar whether or not this mouse was included). The power at the focal plane  
785 was calibrated to 5-20 mW. For silencing and stimulation, stimuli were delivered for every ten  
786 seconds while the mice were eating, regardless of whether they were currently in holding or  
787 oromaneal.

788

## 789 **Data analysis**

790 All neural firing data was binned into 1 ms bins aligned to simultaneously recorded video  
791 frames prior to further analysis.

792 *Analysis of event-aligned data.* For Fig. 3-5, each active unit's spike train was first aligned  
793 to the events of interest (transport-to-mouth movement starts, regrip peaks, lowering-from-mouth  
794 movement starts). Due to sparse firing of many active units, spike trains were further binned into

795 20 ms bins after alignment, thus providing smoother firing rate estimates while preserving the  
796 precise alignment to kinematics possible with kilohertz-rate video. Peri-event time histograms  
797 (PETHs) for each unit spanning 0.5s before to 1.0s after transport-to-mouth or lowering-from-  
798 mouth movements and 0.5s before to 0.5s after regrips were constructed by averaging the event-  
799 aligned binned firing rates over events. Significance of PETHs was assessed as follows. A  
800 bootstrap distribution of PETHs was constructed for each active unit and event type by randomly  
801 placing virtual transport-to-mouth or lowering-from-mouth onset times in each holding interval or  
802 oromanual event, respectively, or by placing a number of random regrip times equal to the number  
803 of actual regrips in each oromanual event. This was repeated 10,000 times for each unit and event  
804 type. Then, for each active unit and event type, two one-sided  $p$ -values for excitation and inhibition  
805 were calculated as the fraction of bootstrapped PETHs with maximum firing rates greater or equal  
806 to that of the real PETH or minimum firing rates less than or equal to that of the real PETH,  
807 respectively. Finally, an active unit was designated as significantly excited or inhibited by a given  
808 event type if the corresponding  $p$ -value was significant at a Holm-Bonferroni corrected alpha level  
809 of 0.05.

810 Peak excitation (inhibition) latencies were calculated for each active unit as the time bin of  
811 its PETH having the maximum (minimum) firing rate. The onset latency was calculated as the last  
812 time bin in which the PETH was less than (greater than) the minimum (maximum) pre-peak (pre-  
813 trough) firing rate of the PETH plus (minus) 10% of the difference between the minimum and  
814 maximum firing rates.

815 An oromanual phasic-tonic index (PTI) was calculated for each active unit as  $(FR_{\text{peak}} -$   
816  $FR_{\text{end}})/(FR_{\text{peak}} + FR_{\text{end}})$ , where  $FR_{\text{peak}}$  is the average firing rate in a 200 ms window surrounding the  
817 PETH bin with maximal firing rate and  $FR_{\text{end}}$  is the average firing rate in the 200 ms before the



818 lowering-from-mouth movement (i.e., the last 200 ms of each oromanual event). This is similar to  
819 the definition used previously (Shalit et al., 2012), except that the window used to estimate peak  
820 firing is adapted on a per-unit basis, rather than using a fixed window.

821 Probe-average firing rates were estimated by averaging PETHs for all active units  
822 simultaneously recorded on the same probe. The probe-average PTI was calculated from this  
823 probe-average PETH exactly as for the active unit PTIs.

824 *Non-negative matrix factorization analysis.* Following Xu et al. (Xu et al., 2020), we used  
825 non-negative matrix factorization (NNMF) to perform simultaneous dimensionality reduction and  
826 clustering of unit responses. First, each unit's firing rate was smoothed by convolution with a 20  
827 ms causal boxcar, then aligned to transport-to-mouth, regrip, and lowering-from-mouth  
828 movements. Each unit's mean response from -300 ms before to 300 ms after each event was  
829 calculated, temporally concatenated across conditions, and normalized to the interval [0, 1]. Units  
830 with zero mean event-aligned firing rate across all conditions were excluded as the normalized  
831 response is undefined in this case. The remaining normalized responses were concatenated into a  
832 single  $T \times N$  matrix, where  $T$  is the number of time bins and  $N$  the number of units. This matrix  
833 was factorized into a  $W = T \times k$  matrix of response templates and an  $H = k \times N$  matrix of response  
834 weights using the `nnmf` function in Matlab. The optimal number of factors  $k$  was found based on  
835 1000-fold leave-one-out bi-cross-validation (Owen and Perry, 2009), wherein one time bin and  
836 one unit are randomly left out of the input matrix to NNMF,  $W$  and  $H$  are recalculated, then the  
837 process is repeated 1000 times and  $k$  is chosen to minimize the mean (across folds) squared error  
838 between the full input matrix and the product of the factorizations calculated on the reduced input  
839 matrices. Units were pooled across mice and experiments for NNMF analysis. Each active unit

840 was assigned to a cluster corresponding to the factor with the greatest contribution to that unit's  
841 activity (i.e., the factor with the greatest weight in that unit's column of the H matrix).

842 *Kinematic reconstruction.* To reconstruct forelimb trajectories from neural activity, we fit  
843 general linear models (GLM) from sliding windows of varying length and lag to the X, Y, and Z,  
844 coordinates of the third digit of each hand. The median nose position was taken as the origin and  
845 trajectories for each experiment were rotated to align the X, Y, and Z world axes with vectors  
846 perpendicular to the mouse's sagittal, coronal, and horizontal planes (i.e., movements along the X,  
847 Y, and Z axes corresponded to side-to-side, back-and-forth, and up-and-down movements,  
848 respectively). Trajectories and firing activity were binned into 20 ms bins, as for the PETH  
849 analyses. GLMs were fit using the fitrlinear function in Matlab using ridge regularization. Half the  
850 data was used to choose the ridge parameter,  $\lambda$ , using Bayesian hyperparameter optimization with  
851 ten cross-validation folds. Having found the optimal  $\lambda$ , the GLMs were re-fit to the remaining half  
852 of the data using ten-fold cross-validation. Reported  $R^2$  and regression coefficient values in the  
853 text are means over folds.

854

## 855 **Histology**

856 Probes were coated with fluorescent dye (DiO, DiI, or DiD, Vybrant Multicolor Cell  
857 Labeling Kit, Invitrogen, Carlsbad, CA) for subsequent histological verification of probe  
858 placement under epifluorescence microscopy. Following the final recording with each mouse, the  
859 mouse was sacrificed by overdose of isoflurane followed by decapitation, and the brain was  
860 quickly dissected and placed in 4% paraformaldehyde solution (Electron Microscopy Sciences,  
861 Hatfield, PA) in 0.01 M phosphate-buffered saline (PBS, Sigma-Aldrich, Burlington, MA). Brains  
862 were fixed overnight, then washed the next day with PBS and stored in PBS with 0.02% w/v

863 sodium azide (DOT Scientific, Burton, MI) until imaging. To image electrode tracks, brains were  
864 sliced into 100  $\mu\text{m}$  serial sections using a microtome (Microm HM 650 V, Microm International,  
865 Walldorf, Germany) and imaged with a Retiga 2000R CCD camera (QImaging, Burnaby, BC,  
866 Canada) mounted on an Olympus SZX16 upright microscope (Olympus, Tokyo, Japan). Slices  
867 were imaged under bright-field illumination and appropriate fluorescent illumination for the dye(s)  
868 used in each experiment. If the dyed probe track could not be found, probe location was based on  
869 appearance of probe tracks in the bright-field image. Stereotactic coordinates were calculated for  
870 the top and bottom of the probe track as follows. The AP coordinate relative to bregma was found  
871 by counting slices from the slice containing the middle of the anterior commissure. The ML  
872 coordinate was taken as the horizontal distance to the midline in pixel values, converted to  
873 micrometers using a previously calibrated conversion factor for the magnification at which the  
874 image was taken. Finally, the coordinates of each recording were defined as the mean of the AP  
875 and ML coordinates of the top and bottom of the corresponding probe track. In one case, because  
876 probe tracks could not be recovered histologically, areal assignment was based on the coordinates  
877 of the area targeted.

878

## 879 **Statistical analyses**

880 All data presented in figures and the main text are means  $\pm$  standard deviation unless  
881 otherwise indicated. Recordings were made on multiple days for some mice, with the probes being  
882 repositioned each day. In these instances, kinematic data from the same mouse are pooled across  
883 days, but data relating to neural activity from the same cortical area are averaged first within and  
884 then across days. For hypothesis testing, nonparametric tests were used wherever possible. For  
885 paired samples, Wilcoxon's signed rank was used unless the number of samples was below the

886 minimum required for significance at a  $p < 0.05$  level (i.e.,  $n < 6$ ), in which case paired  $t$ -tests were  
887 used provided the distribution of paired differences was not significantly different from normal as  
888 assessed by the Shapiro-Wilk test. For comparing medians among more than two groups, Kruskal-  
889 Wallis ANOVA was used. For comparing means among groups across two factors simultaneously,  
890 non-parametric two-way ANOVA was performed using permutation tests via the `aovp` function in  
891 R. For comparing parameters measured at multiple timepoints (optogenetic silencing and  
892 stimulation experiments) or across multiple conditions (side and coordinate for reconstruction) in  
893 the same mice, repeated-measures ANOVA in Matlab (for one within-subject factor) or R (for  
894 multiple within-subject factors) was used after checking normality of data within each level of  
895 each within-subjects factor using the Shapiro-Wilk test and sphericity using Mauchly's test. Where  
896 sphericity was violated, the Greenhouse-Geisser correction was applied to the degrees of freedom  
897 of the corresponding  $F$ -test. In all cases the Bonferroni method was used for follow-up  
898 comparisons. For regression where the slope was expected to vary per mouse, linear mixed-effects  
899 regression models were used with mouse as a grouping variable and residuals visually inspected  
900 for normality to ensure goodness of fit.

901

## 902 **ACKNOWLEDGEMENTS**

903 For technical assistance we thank F. Hausmann, M. Martin, M. Raineri Tapies, and M. Torres. For  
904 comments and advice on a draft of the paper, we thank L. Miller, A. Miri, L. Pinto, and M. Tresch.

905

906 Grant support: National Institute of Neurological Disorders and Stroke of the National Institutes  
907 of Health under Award Numbers R01NS061963 and R21NS116886.

908

## 909 REFERENCES

- 910 Ayling OG, Harrison TC, Boyd JD, Goroshkov A, Murphy TH (2009) Automated light-based  
911 mapping of motor cortex by photoactivation of channelrhodopsin-2 transgenic mice. *Nat*  
912 *Methods* 6:219-224.
- 913 Barrett JM, Raineri Tapies MG, Shepherd GMG (2020) Manual dexterity of mice during food-  
914 handling involves the thumb and a set of fast basic movements. *PLoS One* 15:e0226774.
- 915 Batty E, Whiteway MR, Saxena S, Biderman D, Abe T, Musall S, Gillis W, Markowitz JE,  
916 Churchland A, Cunningham J, Datta SR, Linderman SW, Paninski L (2019) BehaveNet:  
917 nonlinear embedding and Bayesian neural decoding of behavioral videos. *Adv Neur In*  
918 32:1-12.
- 919 BICCN (2021) A multimodal cell census and atlas of the mammalian primary motor cortex.  
920 *Nature* 598:86-102.
- 921 Fromm C, Evarts EV (1977) Relation of motor cortex neurons to precisely controlled and  
922 ballistic movements. *Neurosci Lett* 5:259-265.
- 923 Graziano MS, Taylor CS, Moore T (2002) Complex movements evoked by microstimulation of  
924 precentral cortex. *Neuron* 34:841-851.
- 925 Graziano MSA (2016) Ethological action maps: a paradigm shift for the motor cortex. *Trends*  
926 *Cogn Sci* 20:121-132.
- 927 Guo JZ, Sauerbrei BA, Cohen JD, Mischiati M, Graves AR, Pisanello F, Branson KM, Hantman  
928 AW (2021) Disrupting cortico-cerebellar communication impairs dexterity. *eLife*  
929 10:e65906.
- 930 Guo JZ, Graves AR, Guo WW, Zheng J, Lee A, Rodriguez-Gonzalez J, Li N, Macklin JJ,  
931 Phillips JW, Mensh BD, Branson K, Hantman AW (2015) Cortex commands the  
932 performance of skilled movement. *eLife* 4:e10774.
- 933 Guo ZV, Hires SA, Li N, O'Connor DH, Komiyama T, Ophir E, Huber D, Bonardi C, Morandell  
934 K, Gutnisky D, Peron S, Xu NL, Cox J, Svoboda K (2014) Procedures for behavioral  
935 experiments in head-fixed mice. *PLoS One* 9:e88678.
- 936 Hall NJ, Herzfeld DJ, Lisberger SG (2021) Evaluation and resolution of many challenges of  
937 neural spike-sorting: a new sorter. *bioRxiv*.
- 938 Hippenmeyer S, Vrieseling E, Sigrist M, Portmann T, Laengle C, Ladle DR, Arber S (2005) A  
939 developmental switch in the response of DRG neurons to ETS transcription factor  
940 signaling. *PLoS Biol* 3:e159.
- 941 Hira R, Terada S, Kondo M, Matsuzaki M (2015) Distinct functional modules for discrete and  
942 rhythmic forelimb movements in the mouse motor cortex. *J Neurosci* 35:13311-13322.
- 943 Hsu AI, Yttri EA (2021) B-SOiD, an open-source unsupervised algorithm for identification and  
944 fast prediction of behaviors. *Nature communications* 12:5188.
- 945 Hwang EJ, Dahlen JE, Mukundan M, Komiyama T (2021) Disengagement of motor cortex  
946 during long-term learning tracks the performance level of learned movements. *J Neurosci*  
947 41:7029-7047.
- 948 Hwang EJ, Dahlen JE, Hu YY, Aguilar K, Yu B, Mukundan M, Mitani A, Komiyama T (2019)  
949 Disengagement of motor cortex from movement control during long-term learning. *Sci*  
950 *Adv* 5:eaay0001.
- 951 Jiang Y, Parameswaran R, Li X, Carvalho-de-Souza JL, Gao X, Meng L, Bezanilla F, Shepherd  
952 GMG, Tian B (2019) Nongenetic optical neuromodulation with silicon-based materials.  
953 *Nat Protoc* 14:1339-1376.

- 954 Jiang Y et al. (2018) Rational design of silicon structures for optically controlled multiscale  
955 biointerfaces. *Nat Biomed Eng* 2:508-521.
- 956 Karashchuk P, Rupp KL, Dickinson ES, Sanders E, Azim E, Brunton BW, Tuthill JC (2020)  
957 Anipose: a toolkit for robust markerless 3D pose estimation. *bioRxiv*.
- 958 Lee DD, Seung HS (1999) Learning the parts of objects by non-negative matrix factorization.  
959 *Nature* 401:788-791.
- 960 Li N, Daie K, Svoboda K, Druckmann S (2016) Robust neuronal dynamics in premotor cortex  
961 during motor planning. *Nature* 532:459-464.
- 962 Li N, Chen S, Guo ZV, Chen H, Huo Y, Inagaki HK, Chen G, Davis C, Hansel D, Guo C,  
963 Svoboda K (2019) Spatiotemporal constraints on optogenetic inactivation in cortical  
964 circuits. *eLife* 8.
- 965 Madisen L et al. (2012) A toolbox of Cre-dependent optogenetic transgenic mice for light-  
966 induced activation and silencing. *Nat Neurosci* 15:793-802.
- 967 Mathis A, Mamidanna P, Cury KM, Abe T, Murthy VN, Mathis MW, Bethge M (2018)  
968 DeepLabCut: markerless pose estimation of user-defined body parts with deep learning.  
969 *Nat Neurosci* 21:1281-1289.
- 970 Mayrhofer JM, El-Boustani S, Foustoukos G, Auffret M, Tamura K, Petersen CCH (2019)  
971 Distinct contributions of whisker sensory cortex and tongue-jaw motor cortex in a goal-  
972 directed sensorimotor transformation. *Neuron* 103:1034-1043 e1035.
- 973 Mercer Lindsay N, Knutsen PM, Lozada AF, Gibbs D, Karten HJ, Kleinfeld D (2019) Orofacial  
974 movements involve parallel corticobulbar projections from motor cortex to trigeminal  
975 premotor nuclei. *Neuron* 104:765-780 e763.
- 976 Miri A, Warriner CL, Seely JS, Elsayed GF, Cunningham JP, Churchland MM, Jessell TM  
977 (2017) Behaviorally selective engagement of short-latency effector pathways by motor  
978 cortex. *Neuron* 95:683-696
- 979 Mohan H, An X, Kondo H, Zhao S, Musall S, Mitra P, Huang ZJ (2021) Cortical glutamatergic  
980 projection neuron types contribute to distinct functional subnetworks. *bioRxiv*.
- 981 Morandell K, Huber D (2017) The role of forelimb motor cortex areas in goal directed action in  
982 mice. *Scientific reports* 7:15759.
- 983 Nelson A, Abdelmesih B, Costa RM (2021) Corticospinal populations broadcast complex motor  
984 signals to coordinated spinal and striatal circuits. *Nat Neurosci* 24:1721-1732.
- 985 Owen AB, Perry PO (2009) Bi-cross-validation of the SVD and the nonnegative matrix  
986 factorization. *The Annals of Applied Statistics* 3:564-594.
- 987 Pachitariu M, Steinmetz N, Kadir S, Carandini M, Harris KD (2016) Kilosort: realtime spike-  
988 sorting for extracellular electrophysiology with hundreds of channels. *bioRxiv*.
- 989 Pereira TD, Shaevitz JW, Murthy M (2020) Quantifying behavior to understand the brain. *Nat*  
990 *Neurosci* 23:1537-1549.
- 991 Ruder L, Schina R, Kanodia H, Valencia-Garcia S, Pivetta C, Arber S (2021) A functional map  
992 for diverse forelimb actions within brainstem circuitry. *Nature* 590:445-450.
- 993 Shalit U, Zinger N, Joshua M, Prut Y (2012) Descending systems translate transient cortical  
994 commands into a sustained muscle activation signal. *Cereb Cortex* 22:1904-1914.
- 995 Sjöbom J, Tamtè M, Halje P, Brys I, Petersson P (2020) Cortical and striatal circuits together  
996 encode transitions in natural behavior. *Sci Adv* 6.
- 997 Sobinov AR, Bensmaia SJ (2021) The neural mechanisms of manual dexterity. *Nat Rev*  
998 *Neurosci* 22:741-757.

999 Steinmetz NA et al. (2021) Neuropixels 2.0: A miniaturized high-density probe for stable, long-  
1000 term brain recordings. *Science* 372:eabf4588.

1001 Tervo DG, Hwang BY, Viswanathan S, Gaj T, Lavzin M, Ritola KD, Lindo S, Michael S,  
1002 Kuleshova E, Ojala D, Huang CC, Gerfen CR, Schiller J, Dudman JT, Hantman AW,  
1003 Looger LL, Schaffer DV, Karpova AY (2016) A designer AAV variant permits efficient  
1004 retrograde access to projection neurons. *Neuron* 92:372-382.

1005 Ullman-Cullere MH, Foltz CJ (1999) Body condition scoring: a rapid and accurate method for  
1006 assessing health status in mice. *Laboratory animal science* 49:319-323.

1007 Umeda T, Isa T, Nishimura Y (2019) The somatosensory cortex receives information about  
1008 motor output. *Sci Adv* 5:eaaw5388.

1009 Warriner CL, Fageiry SK, Carmona LM, Miri A (2020) Towards cell and subtype resolved  
1010 functional organization: mouse as a model for the cortical control of movement.  
1011 *Neuroscience* 450:151-160.

1012 Whishaw IQ, Coles BL (1996) Varieties of paw and digit movement during spontaneous food  
1013 handling in rats: postures, bimanual coordination, preferences, and the effect of forelimb  
1014 cortex lesions. *Behav Brain Res* 77:135-148.

1015 Whiteway MR, Biderman D, Friedman Y, Dipoppa M, Buchanan EK, Wu A, Zhou J, Bonacchi  
1016 N, Miska NJ, Noel J-P, Rodriguez E, Schartner M, Socha K, Urai AE, Salzman CD, The  
1017 International Brain Laboratory, Cunningham JP, Paninski L (2021) Partitioning  
1018 variability in animal behavioral videos using semi-supervised variational autoencoders.  
1019 bioRxiv.

1020 Wiltschko AB, Johnson MJ, Iurilli G, Peterson RE, Katon JM, Pashkovski SL, Abaira VE,  
1021 Adams RP, Datta SR (2015) Mapping sub-second structure in mouse behavior. *Neuron*  
1022 88:1121-1135.

1023 Xu D, Yuxi Chen, Angel M. Delgado, Natasha C. Hughes, Mingyuan Dong, Linghua Zhang,  
1024 O'Connor DH (2020) A functional cortical network for sensorimotor sequence  
1025 generation. bioRxiv.

1026 Yamawaki N, Raineri Tapias MG, Stults A, Smith GA, Shepherd GM (2021) Circuit  
1027 organization of the excitatory sensorimotor loop through hand/forelimb S1 and M1. *eLife*  
1028 10:e66836.

1029

1030

1031
